# Supplementary material for: Expanding the Myxochelin Natural Product Family by Nicotinic Acid Containing Congeners
Source: MDPI journal article supplement (doi:10.3390/molecules26164929), 2021-08-14
Supplement: s1 [file s1]

# Expanding the myxochelin natural product family by nicotinic acid containing congeners

Nicolas A. Frank <sup>1,2,†</sup>, Márió Széles <sup>1,2,†</sup>, Sergi H. Akone <sup>1,2,3</sup>, Sari Rasheed <sup>1,2</sup>, Stephan Hüttel <sup>1,2</sup>, Simon Frewert <sup>1,2</sup>, Mostafa M. Hamed <sup>1,2</sup>, Jennifer Herrmann <sup>1,2</sup>, Sören M. M. Schuler <sup>4</sup>, Anna K. H. Hirsch <sup>1,2</sup> and Rolf Müller <sup>1,2,\*</sup>

<sup>1</sup> Helmholtz-Institute for Pharmaceutical Research Saarland (HIPS), Helmholtz Centre for Infection Research (HZI) and Department of Pharmacy, Saarland University, Campus E8 1, 66123 Saarbrücken, Germany

<sup>2</sup> German Center for Infection Research (DZIF), Partner Site Hannover-Braunschweig, 38124 Braunschweig, Germany

<sup>3</sup> Department of Chemistry, Faculty of Science, University of Douala, P.O.Box 24157 Douala, Cameroon

<sup>4</sup> Evotec International GmbH, 37079 Göttingen, Germany

<sup>†</sup> These authors contributed equally

## Supplementary Information

## Table of Contents

|          |                                                                                 |           |
|----------|---------------------------------------------------------------------------------|-----------|
| <b>1</b> | <b>CHARACTERIZATION OF MYXOCHELIN DERIVATIVES .....</b>                         | <b>3</b>  |
| 1.1      | UV SPECTRA OF THE MYXOCHELINS.....                                              | 3         |
| 1.1.1    | <i>UV spectra of naturally occurring myxochelins .....</i>                      | <i>3</i>  |
| 1.1.2    | <i>UV spectra of synthetic myxochelins .....</i>                                | <i>4</i>  |
| 1.2      | TANDEM MS SPECTRA .....                                                         | 7         |
| 1.2.1    | <i>Tandem MS spectra of naturally occurring myxochelins.....</i>                | <i>7</i>  |
| 1.2.1    | <i>Tandem MS spectra of synthetic myxochelins.....</i>                          | <i>8</i>  |
| 1.3      | CIRCULAR DICHROISM SPECTRA.....                                                 | 10        |
| 1.4      | HPLC-MS CHROMATOGRAMS OF CRUDE EXTRACTS.....                                    | 12        |
| 1.5      | HPLC-MS CHROMATOGRAMS OF THE SYNTHETIC COMPOUNDS .....                          | 15        |
| 1.6      | SYNTHESIS OF ARYL SUBSTITUENTS WITH AN FMOC-PROTECTED AMINO GROUP .....         | 23        |
| 1.7      | NMR-BASED STRUCTURE ELUCIDATION .....                                           | 25        |
| 1.7.1    | <i><sup>1</sup>H and <sup>13</sup>C-spectra of compounds 1 and 3.....</i>       | <i>25</i> |
| 1.7.2    | <i><sup>1</sup>H and <sup>13</sup>C spectra of the synthetic compounds.....</i> | <i>30</i> |
| <b>2</b> | <b><i>IN-SILICO ANALYSIS OF THE MYXOCHELIN N1–N3 BIOSYNTHESIS .....</i></b>     | <b>48</b> |
| 2.1      | METABOLOME DATABASE SEARCH OF 1–3.....                                          | 48        |
| 2.2      | ANALYSIS OF THE MYXOCHELIN BGC.....                                             | 49        |
| <b>3</b> | <b>ASSESSMENT OF BIOLOGICAL ACTIVITIES .....</b>                                | <b>51</b> |
| <b>4</b> | <b>REFERENCES .....</b>                                                         | <b>52</b> |

# 1 Characterization of Myxochelin derivatives

## 1.1 UV spectra of the myxochelins

### 1.1.1 UV spectra of naturally occurring myxochelins

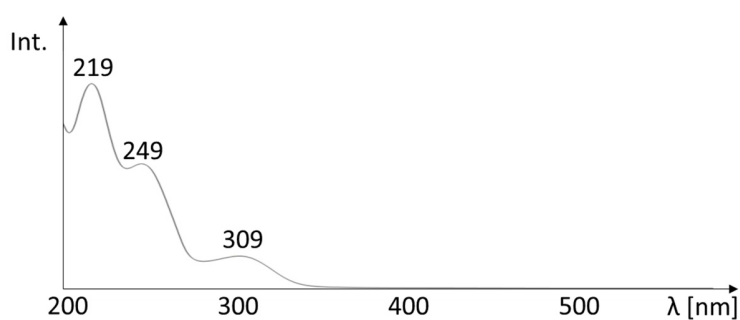

Figure S1. UV spectrum of **1** (natural product) in water/acetonitrile mixture with 0.1% formic acid

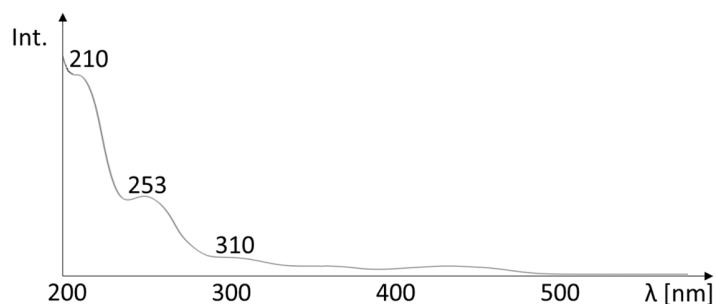

Figure S2. UV spectrum of **2** (natural product) in water/acetonitrile mixture with 0.1% formic acid

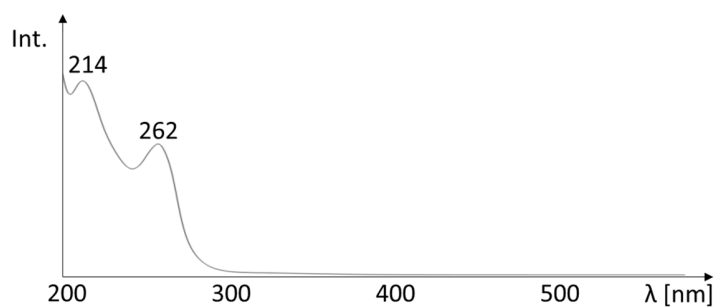

Figure S3. UV spectrum of **3** (natural product) in water/acetonitrile mixture with 0.1% formic acid

### 1.1.2 UV spectra of synthetic myxochelins

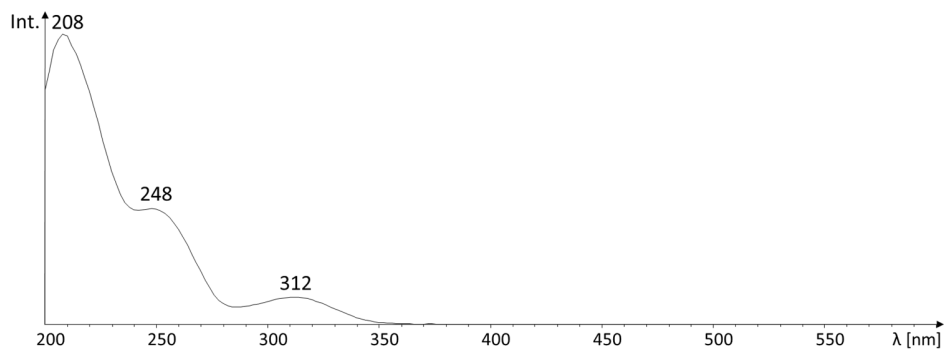

Figure S4. UV spectrum of **9a = 1** (synthetic compound) in water/acetonitrile mixture with 0.1% formic acid

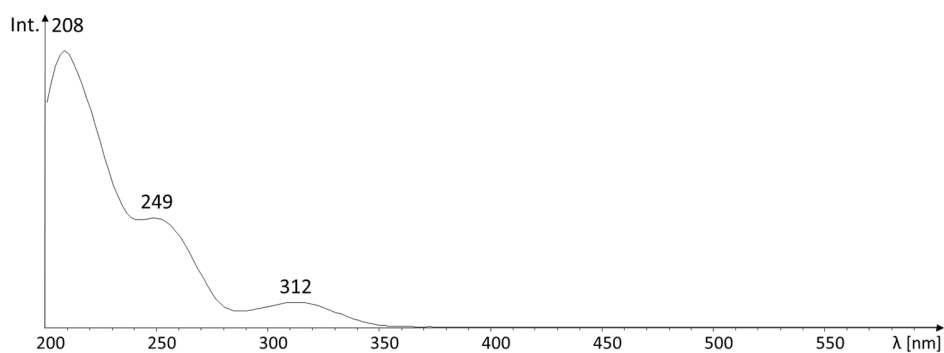

Figure S5. UV spectrum of **9b = 2** (synthetic compound) in water/acetonitrile mixture with 0.1% formic acid

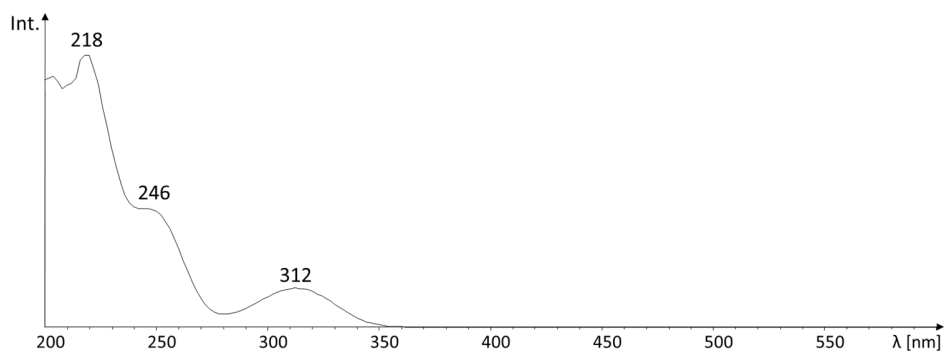

Figure S6. UV spectrum of **9c** in water/acetonitrile mixture with 0.1% formic acid

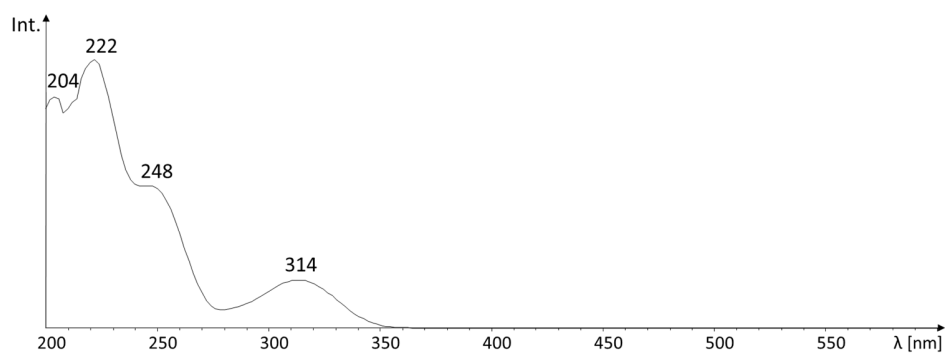

Figure S7. UV spectrum of **9d** in water/acetonitrile mixture with 0.1% formic acid

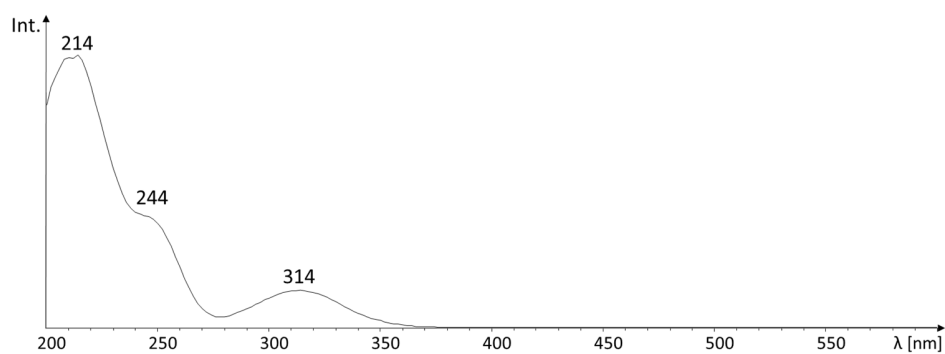

Figure S8. UV spectrum of **9e** in water/acetonitrile mixture with 0.1% formic acid

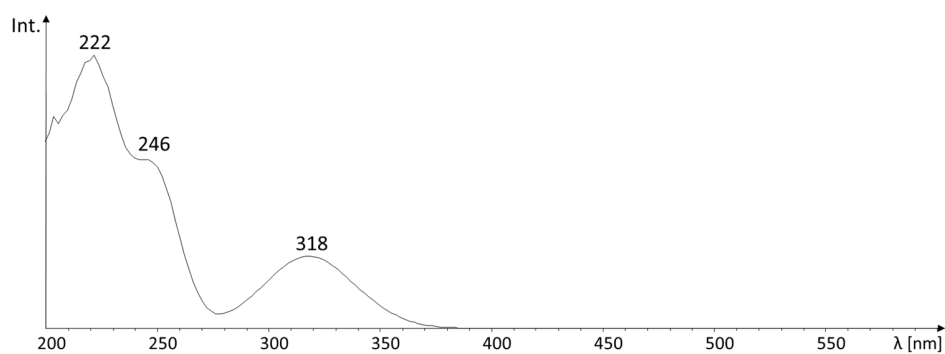

Figure S9. UV spectrum of **9f** in water/acetonitrile mixture with 0.1% formic acid

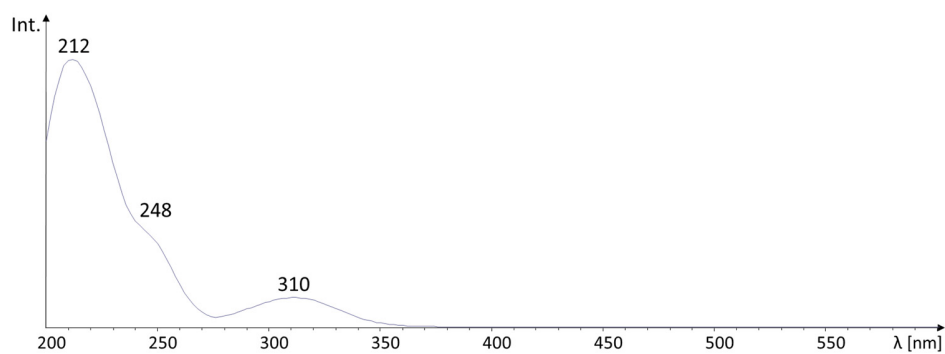

Figure S10. UV spectrum of **9g** in water/acetonitrile mixture with 0.1% formic acid

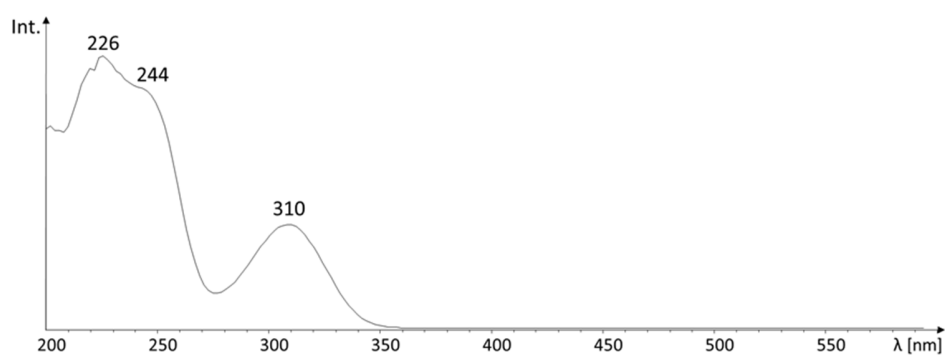

Figure S11. UV spectrum of **9h** in water/acetonitrile mixture with 0.1% formic acid

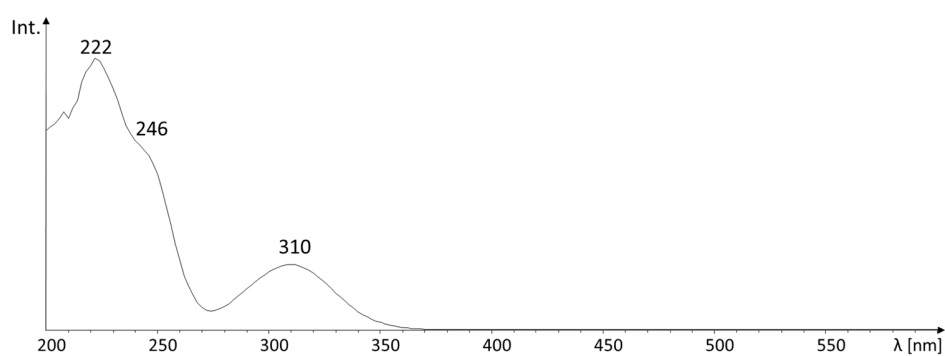

Figure S12. UV spectrum of **9i** in water/acetonitrile mixture with 0.1% formic acid

## 1.2 Tandem MS spectra

### 1.2.1 Tandem MS spectra of naturally occurring myxochelins

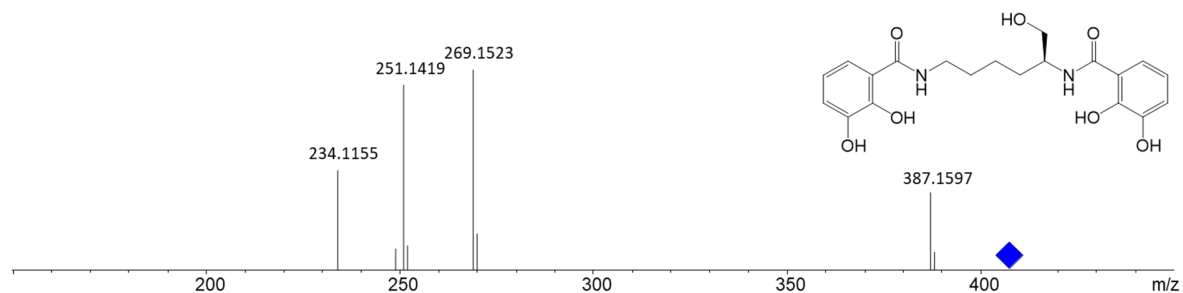

Figure S13. Tandem MS spectrum of myxochelin A

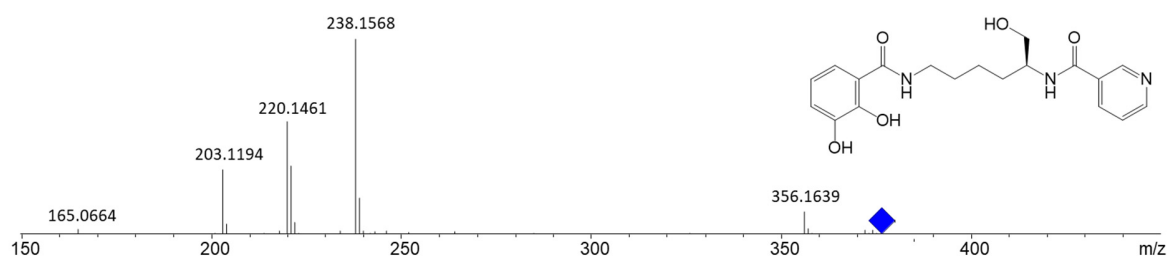

Figure S14. Tandem MS spectrum of **1**

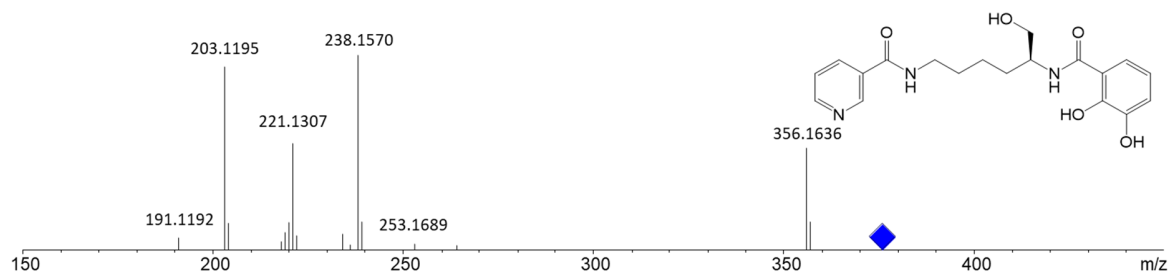

Figure S15. Tandem MS spectrum of **2**

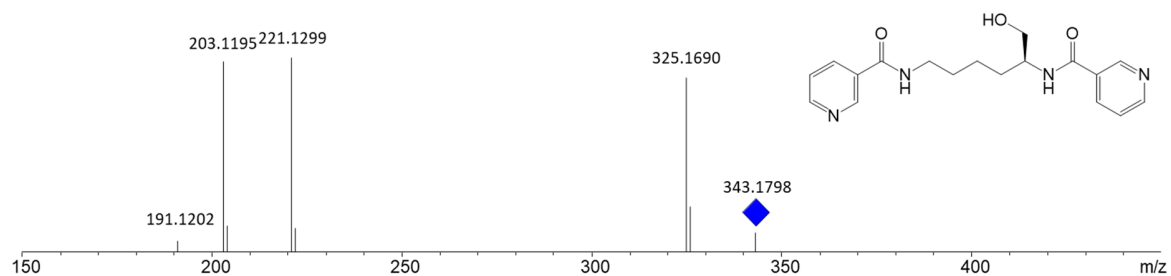

Figure S16. Tandem MS spectrum of **3**

### 1.2.1 Tandem MS spectra of synthetic myxochelins

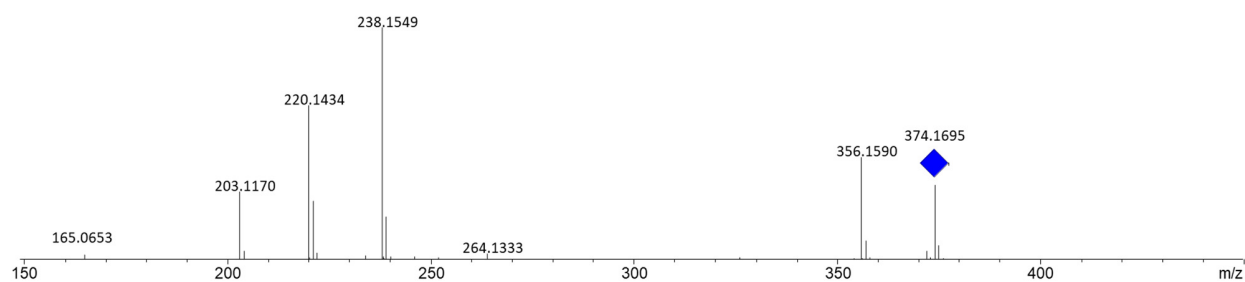

Figure S17. Tandem MS spectrum of **9a = 1**

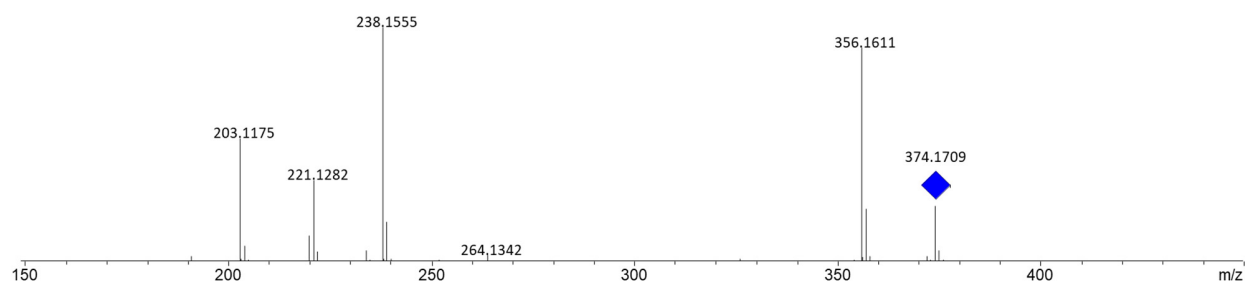

Figure S18. Tandem MS spectrum of **9b = 2**

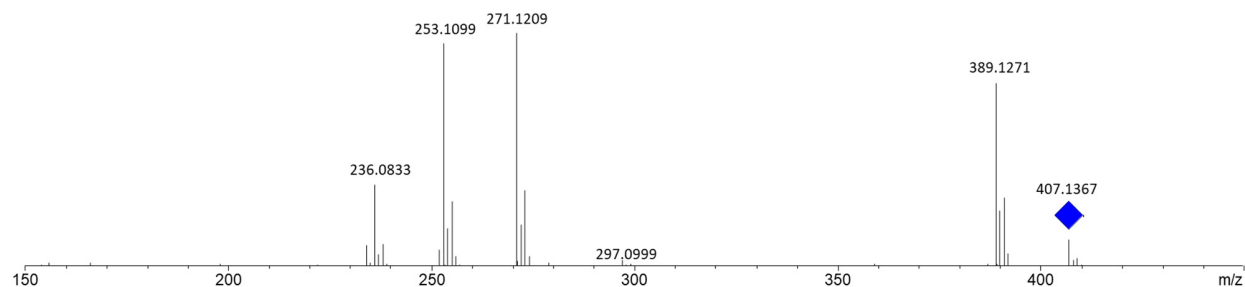

Figure S19. Tandem MS spectrum of **9c**

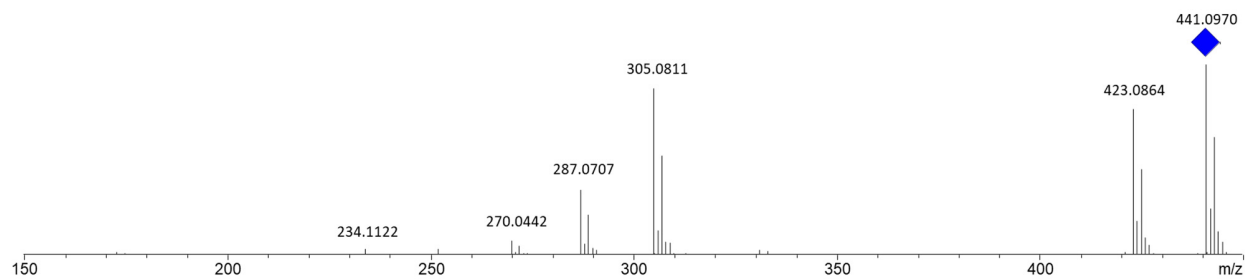

Figure S20. Tandem MS spectrum of **9d**



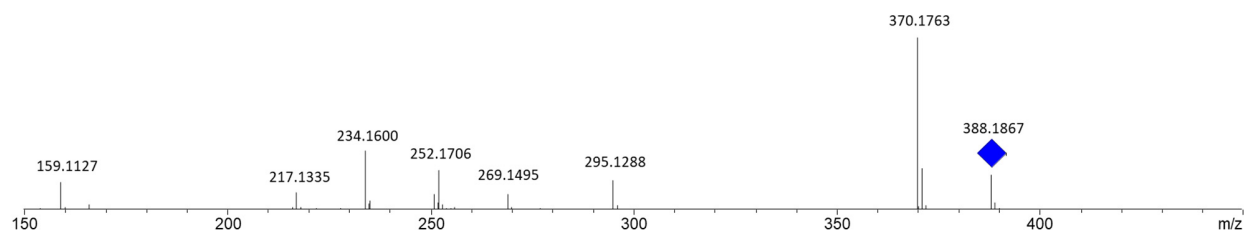

Figure S21. Tandem MS spectrum of **9e**

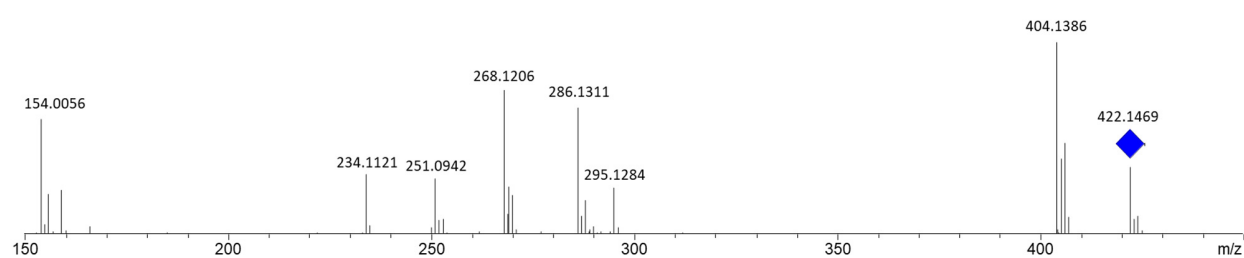

Figure S22. Tandem MS spectrum of **9f**

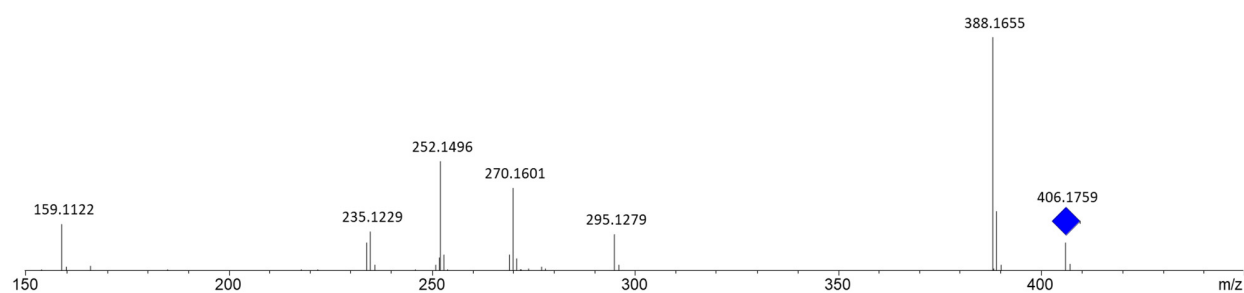

Figure S23. Tandem MS spectrum of **9g**

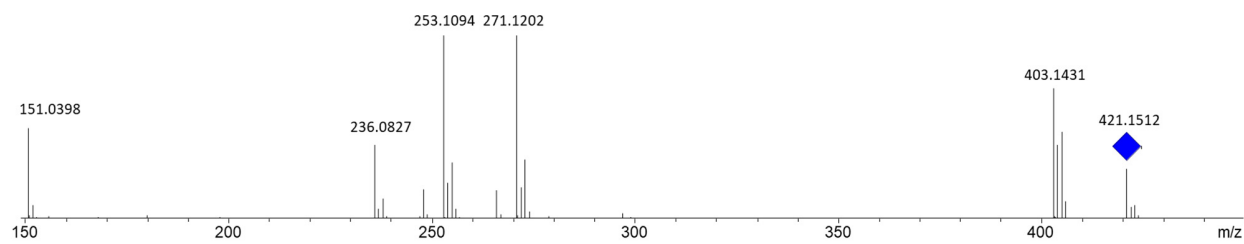

Figure S24. Tandem MS spectrum of **9h**

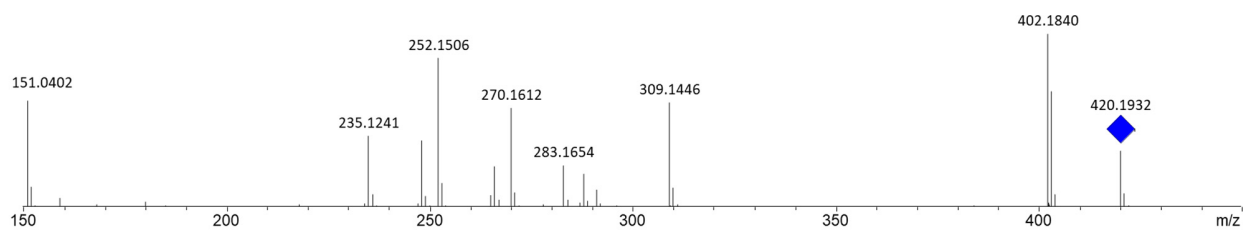

Figure S25. Tandem MS spectrum of **9i**

### 1.3 Circular dichroism spectra

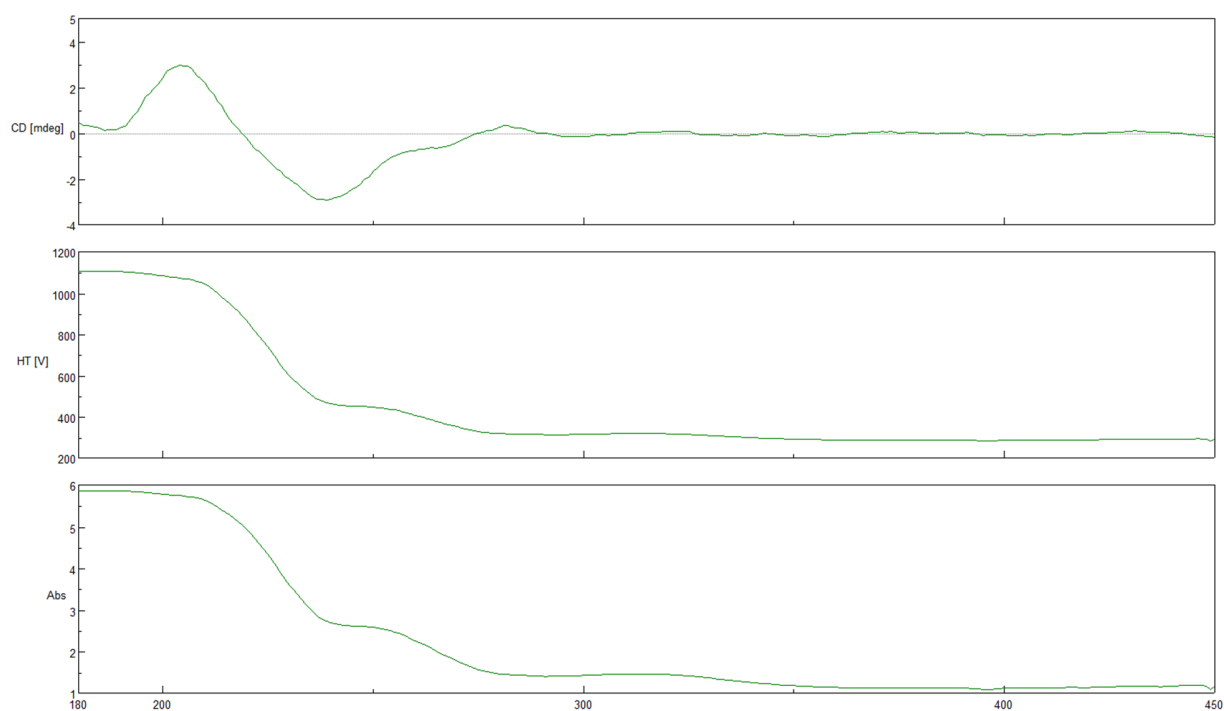

Figure S26. CD spectrum of 1mg/mL **1** (isolated) in methanol in the area 180–450 nm

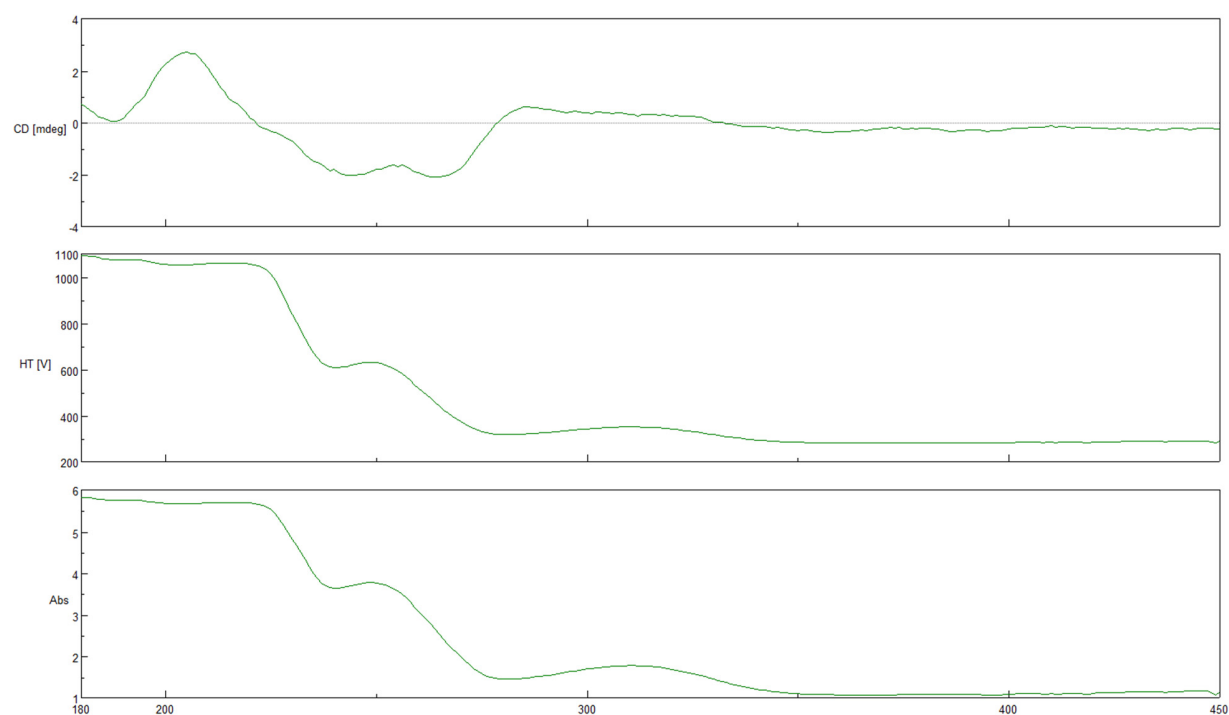

Figure S27. CD spectrum of 1mg/mL **9a = 1** (synthetic) in methanol in the area 180–450 nm

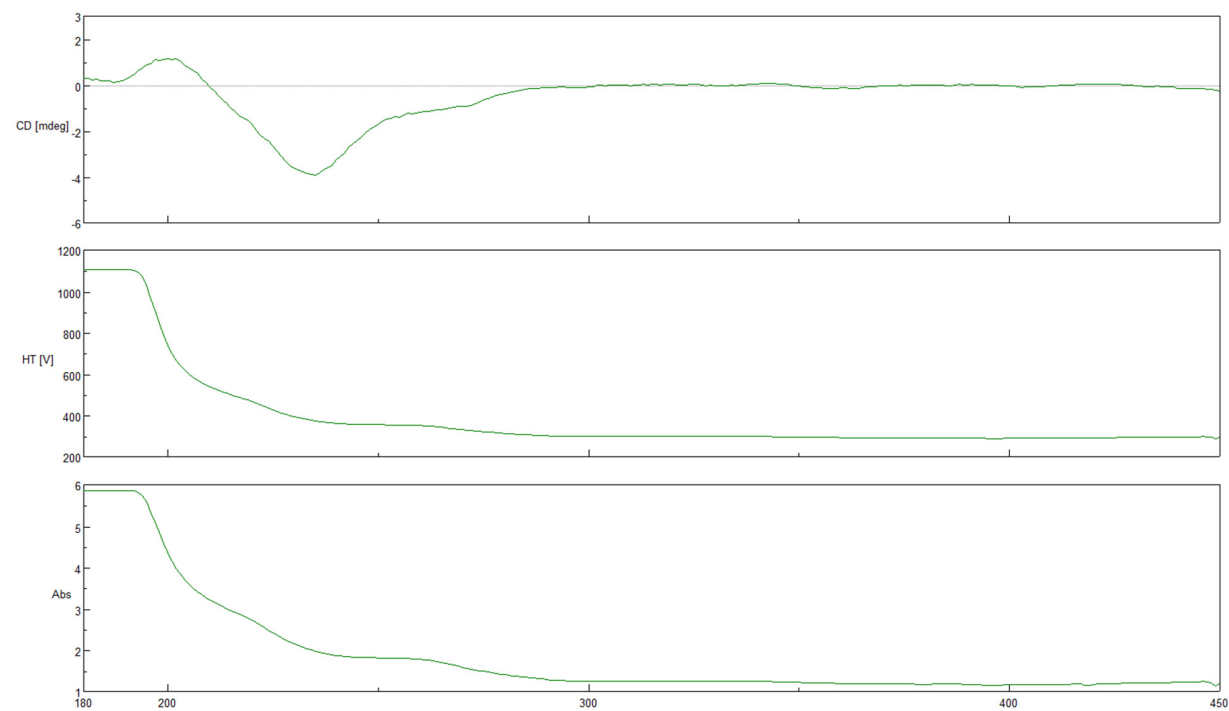

Figure S28. CD spectrum of 1mg/mL **2** (isolated) in methanol in the area 180–450 nm

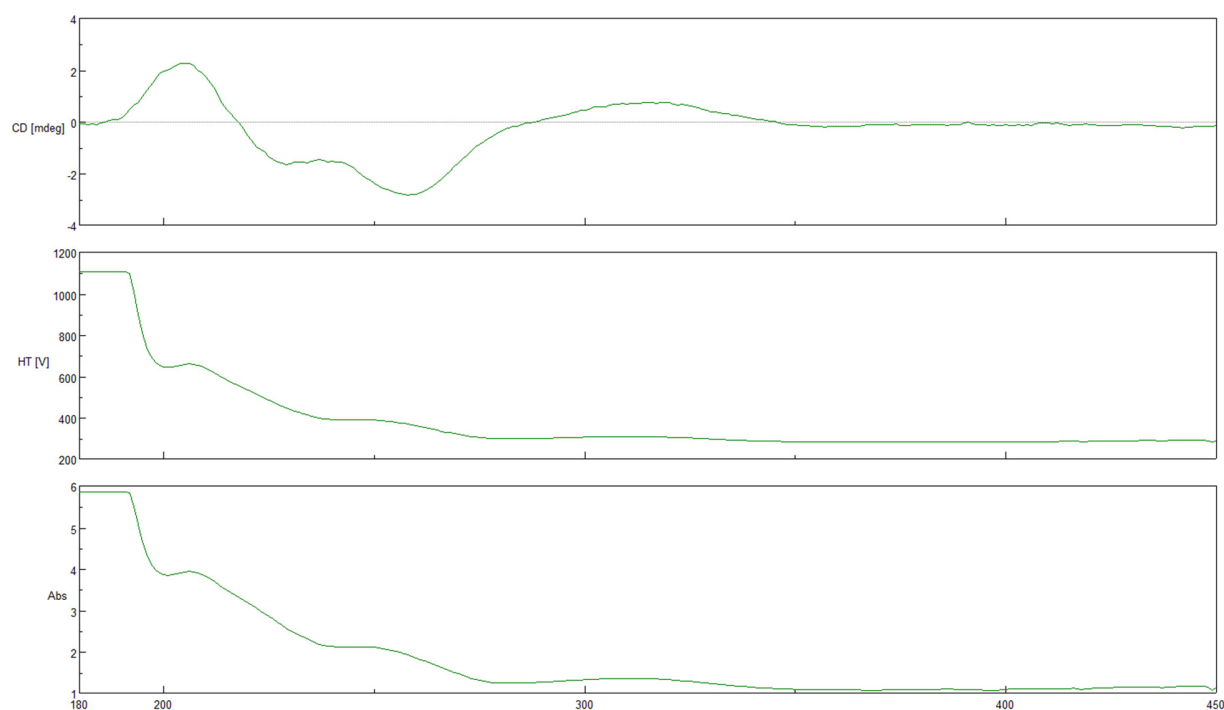

Figure S29. CD spectrum of 1mg/mL **9b = 2** (synthetic) in methanol in the area 180–450 nm

## 1.4 HPLC-MS chromatograms of crude extracts

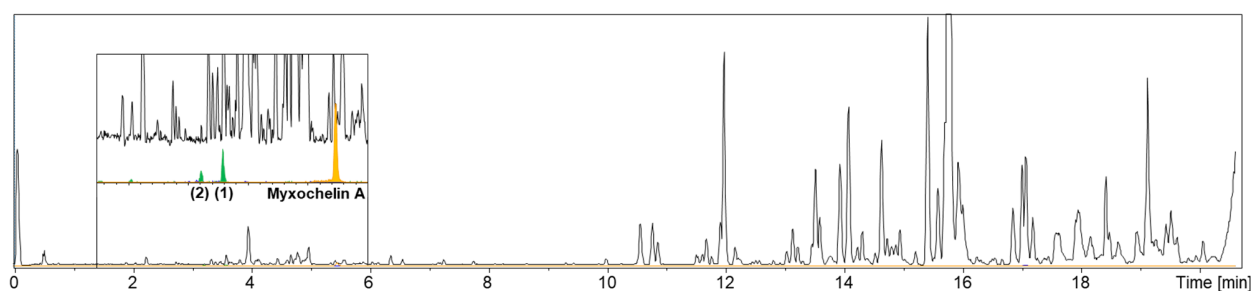

Figure S30. HPLC-MS base peak chromatogram (BPC) of *Coralloccoccus* sp. MCy9049 in VY/2S medium with highlighted extracted ion chromatograms (EICs) of 374.17105 m/z (green: **1**, **2**), 343.17647 m/z (blue, **3**) and 405.16565 (orange: myxochelin A), with a width of 0.005 m/z.

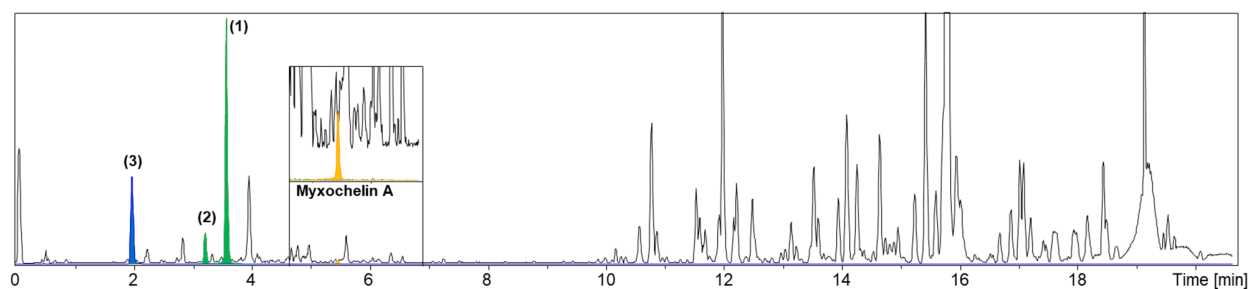

Figure S31. HPLC-MS base peak chromatogram (BPC) of *Coralloecoccus* sp. MCy9049 in VY/2S medium with supplementation of 1 mM nicotinamide with highlighted extracted ion chromatograms (EICs) of 374.17105 m/z (green: **1**, **2**), 343.17647 m/z (blue, **3**) and 405.16565 (orange: myxochelin A), with a width of 0.005 m/z.

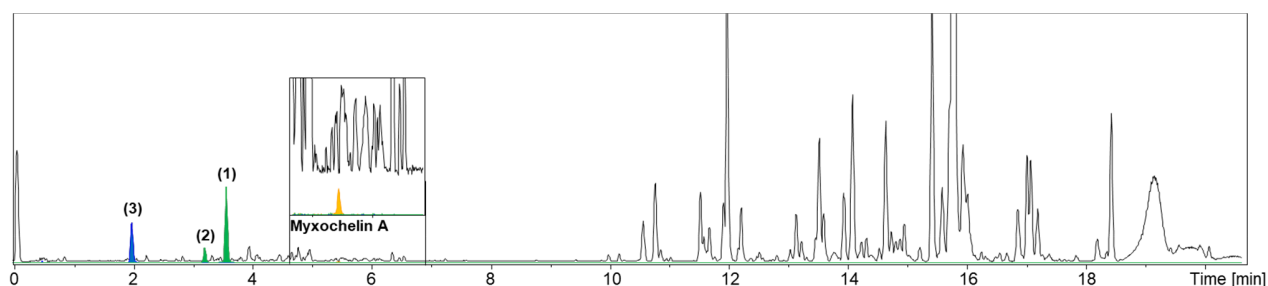

Figure S32. HPLC-MS base peak chromatogram (BPC) of *Coralloecoccus* sp. MCy9049 in VY/2S medium with supplementation of 1 mM nicotinic acid with highlighted extracted ion chromatograms (EICs) of 374.17105 m/z (green: **1**, **2**), 343.17647 m/z (blue, **3**) and 405.16565 (orange: myxochelin A), with a width of 0.005 m/z.

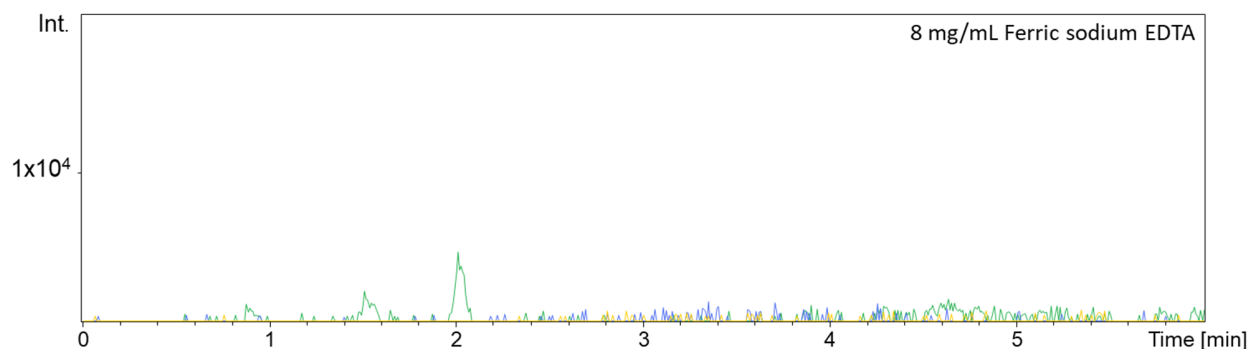

Figure S33. HPLC-MS extracted ion chromatograms (EICs) of 374.17105 m/z (green: **1**, **2**), 343.17647 m/z (blue, **3**) and 405.16565 (orange: myxochelin A), with a width of 0.005 m/z from crude extracts of *Coralloecoccus* sp. MCy9049 in VY/2S medium with supplementation of ferric sodium EDTA.

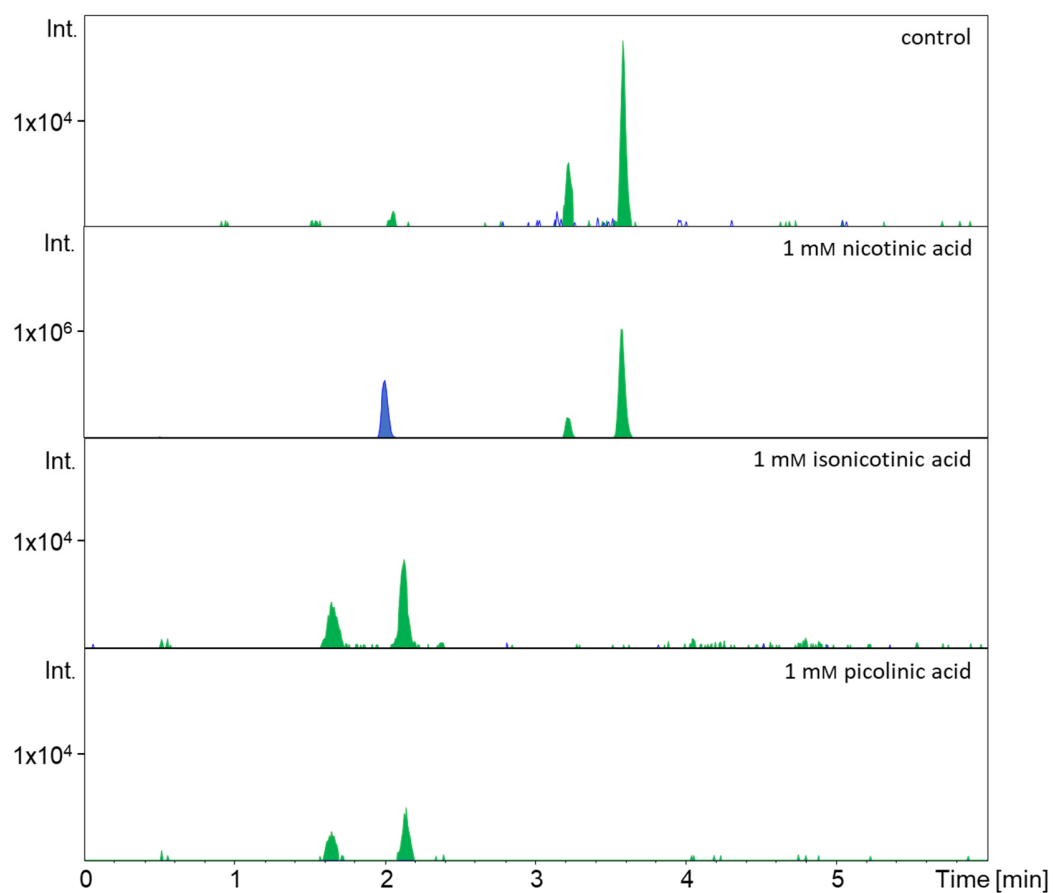

Figure S34. HPLC-MS extracted ion chromatograms (EICs) of 374.17105 m/z (green: **1**, **2**) and 343.17647 m/z (blue, **3**), with a width of 0.005 m/z from crude extracts of *Corallococcus* sp. MCy9049 in VY/2S medium with supplementation of different pyridinecarboxylic acids.

## 1.5 HPLC-MS chromatograms of the synthetic compounds

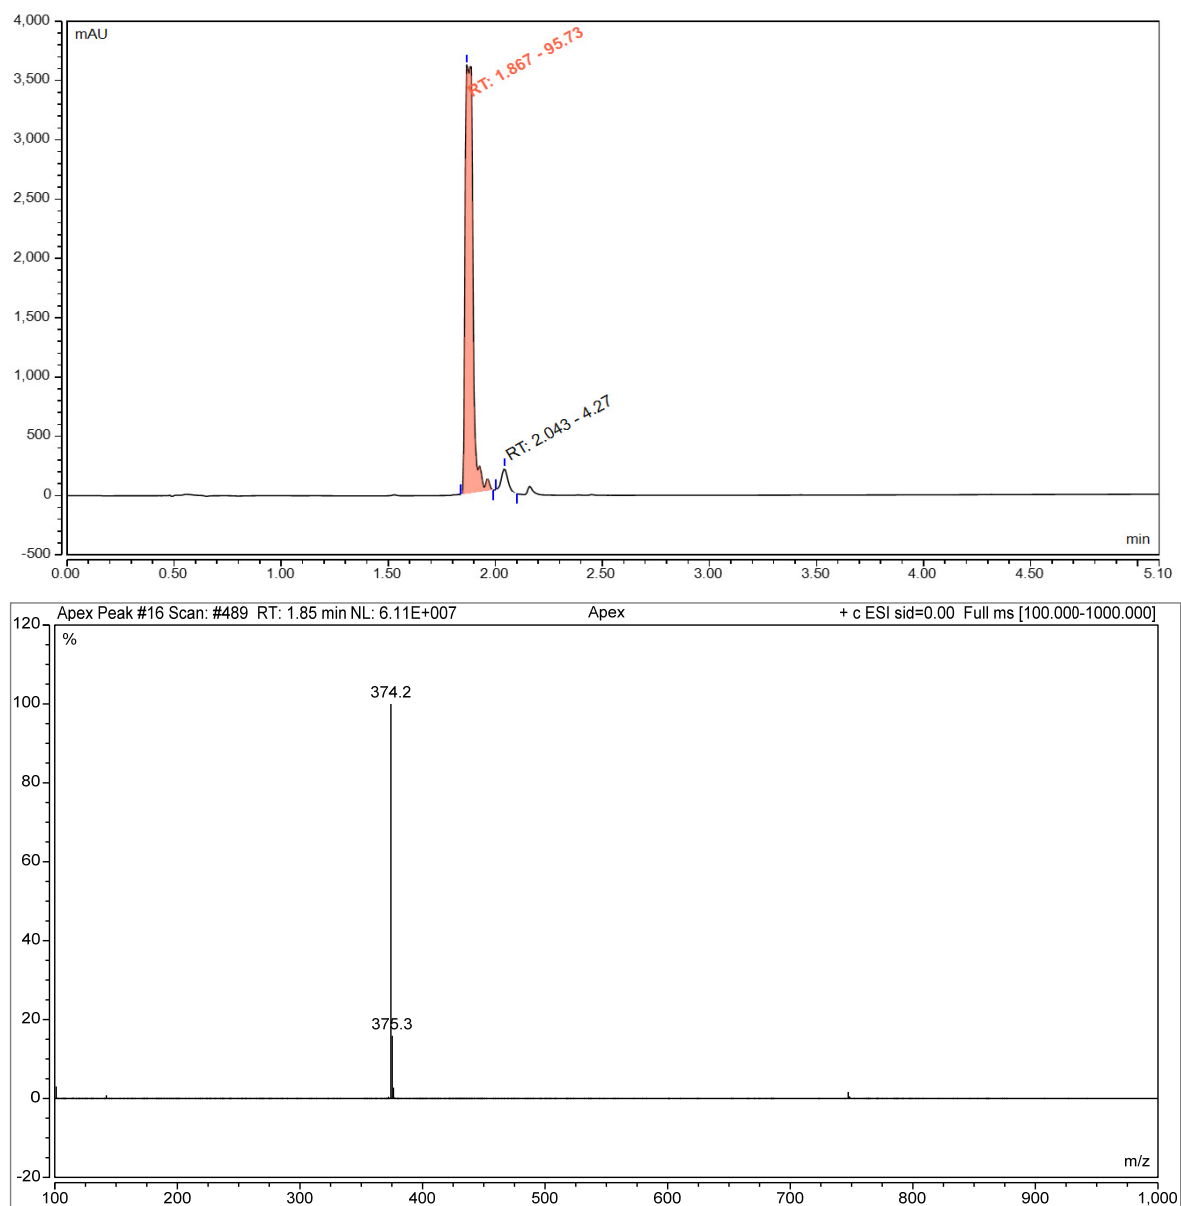

Figure S35. HPLC-MS UV chromatogram and positive ESI-MS of **9a**.

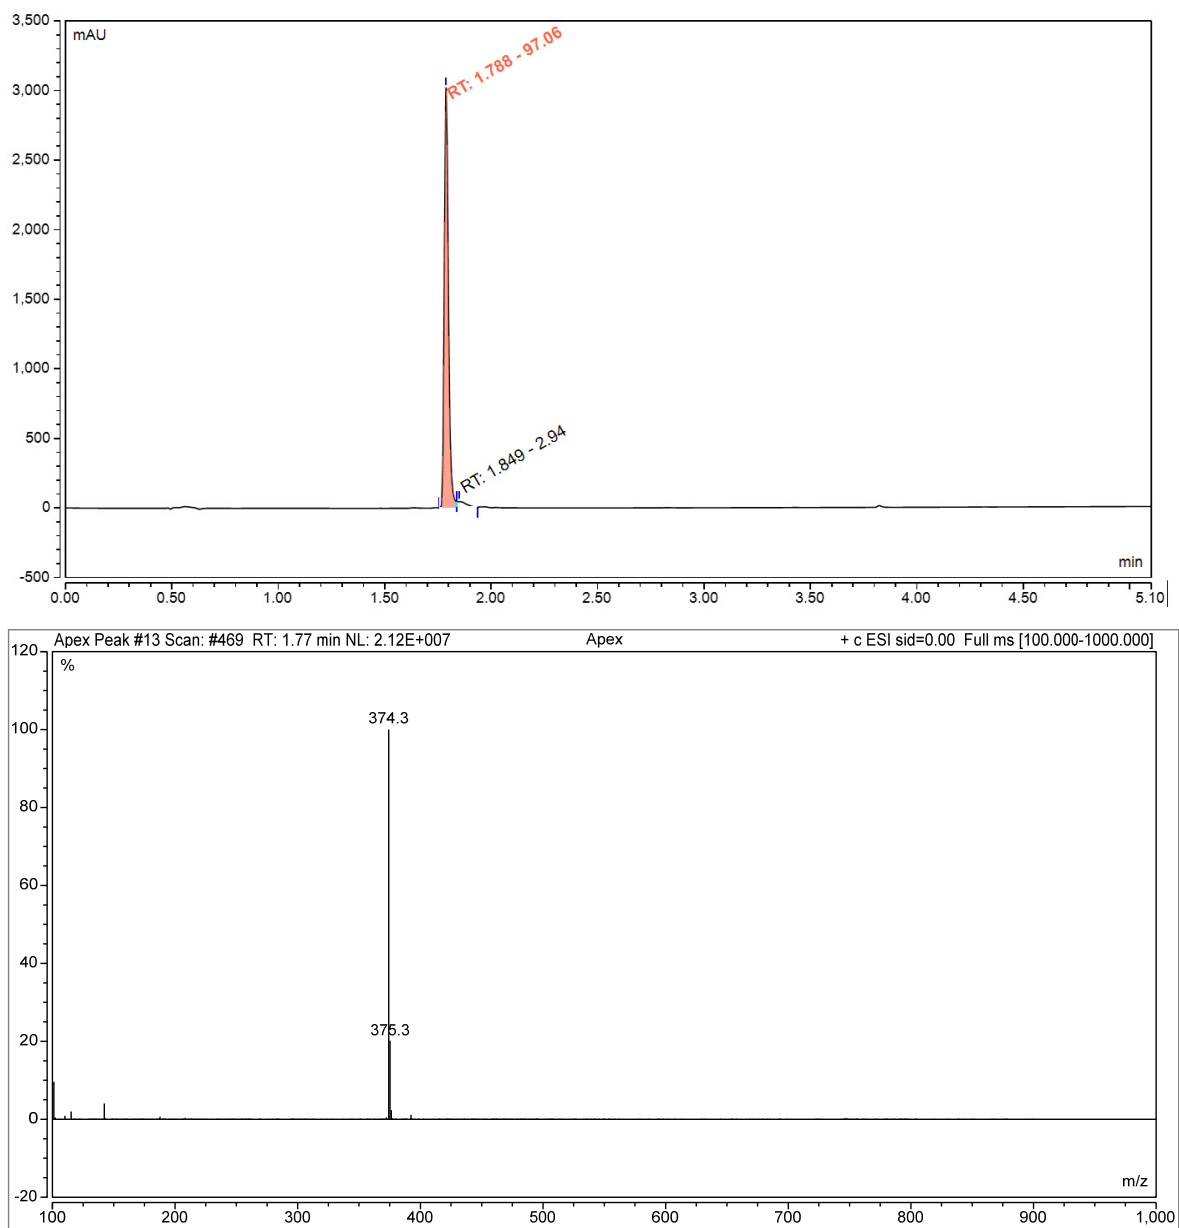

Figure S36. HPLC-MS UV chromatogram and positive ESI-MS of **9b**.



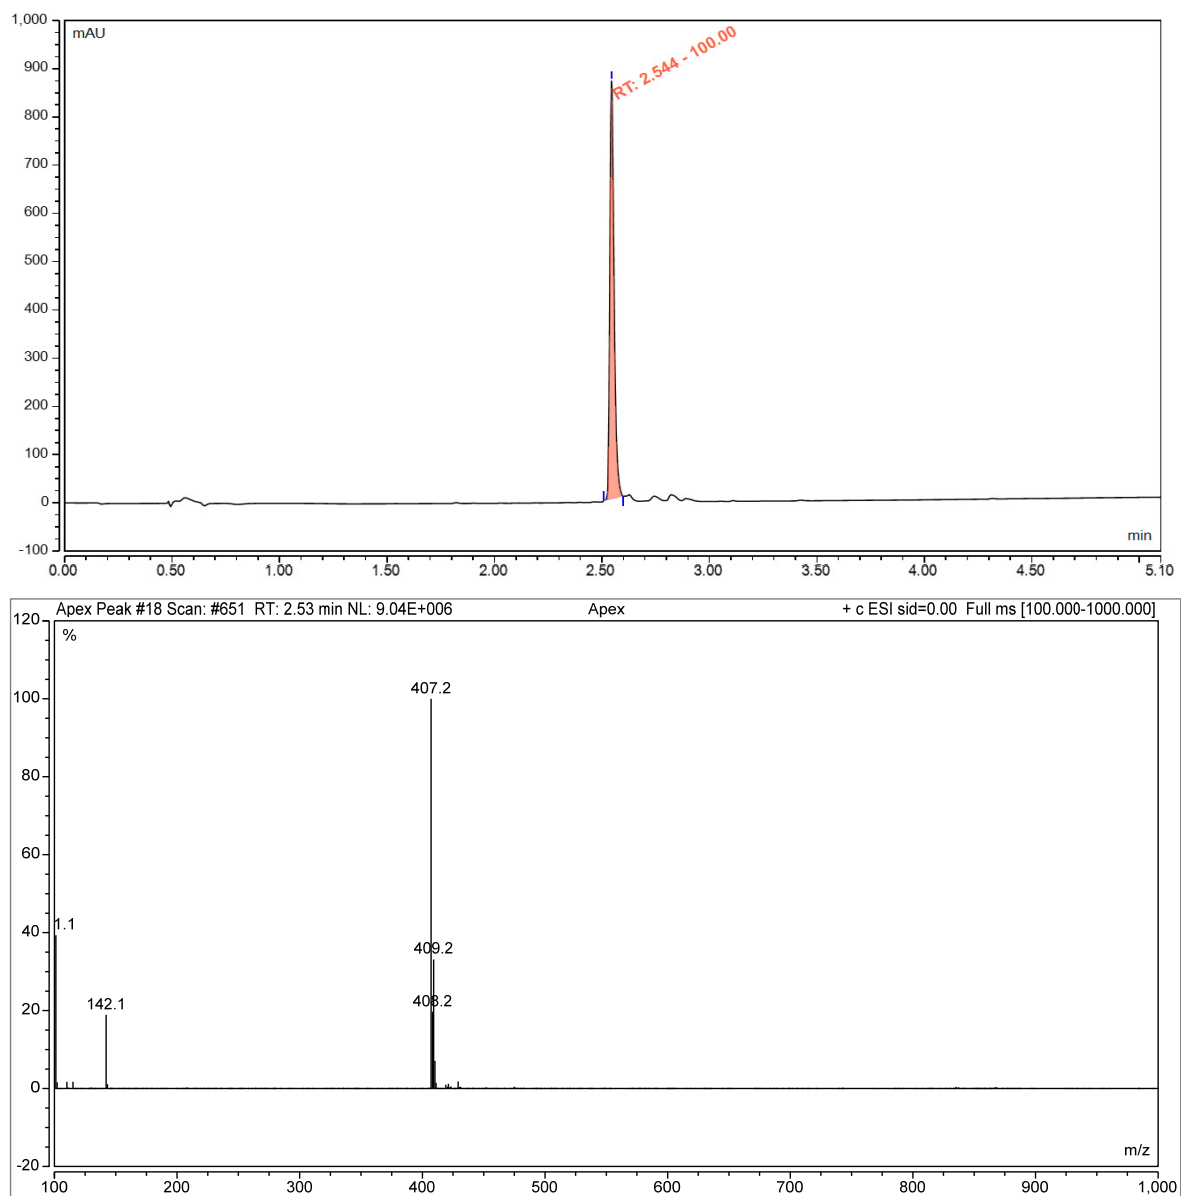

Figure S37. HPLC-MS UV chromatogram and positive ESI-MS of **9c**.

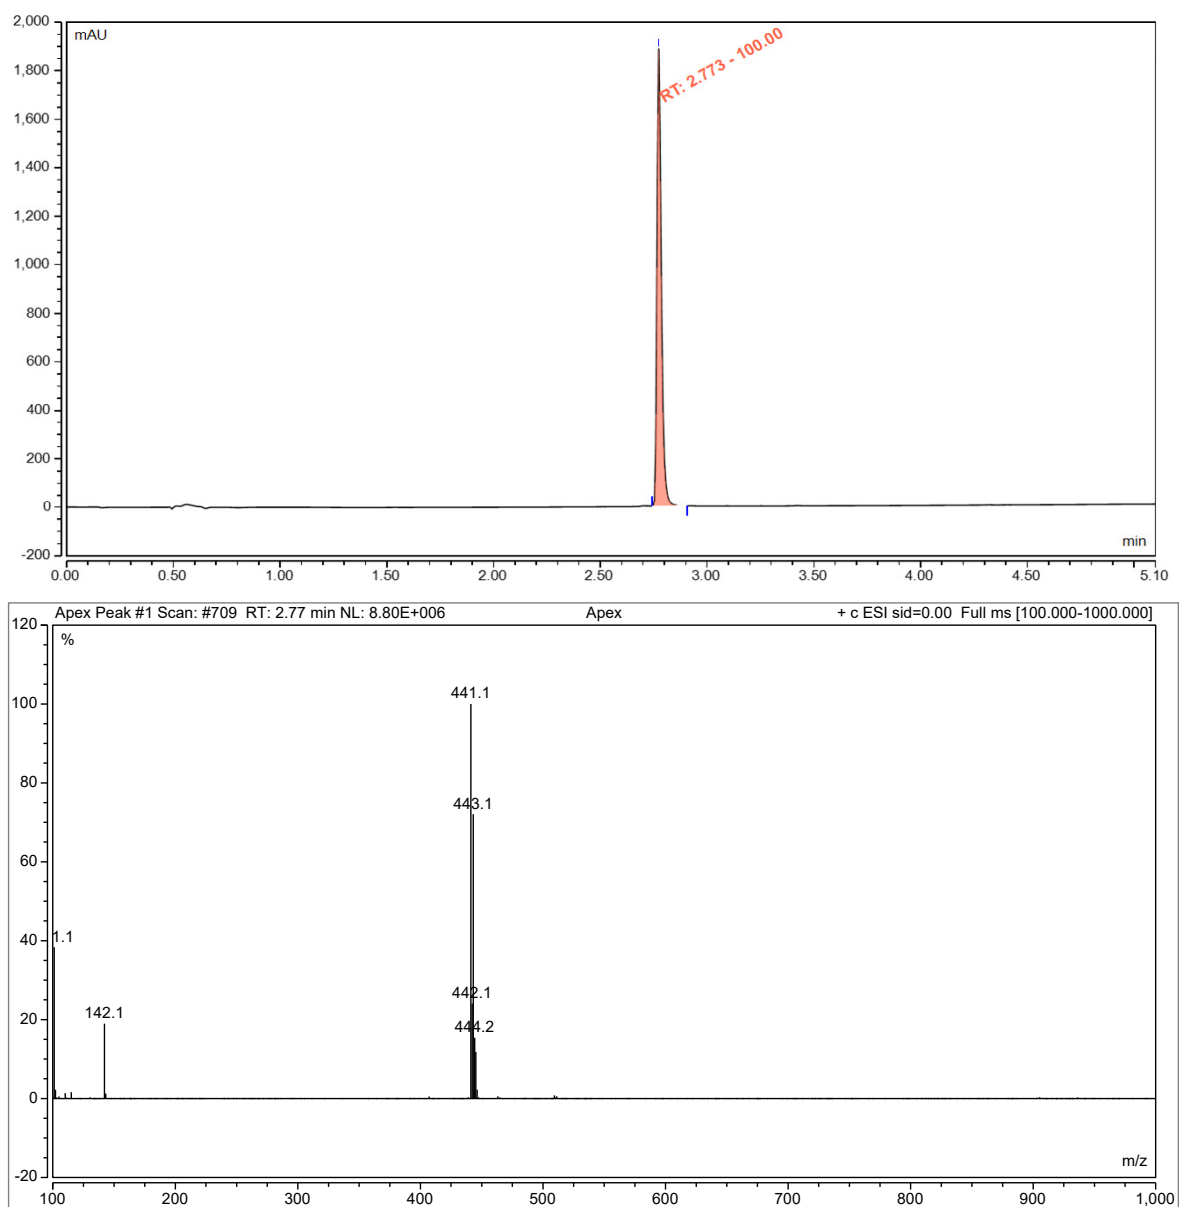

Figure S38. HPLC-MS UV chromatogram and positive ESI-MS of **9d**.

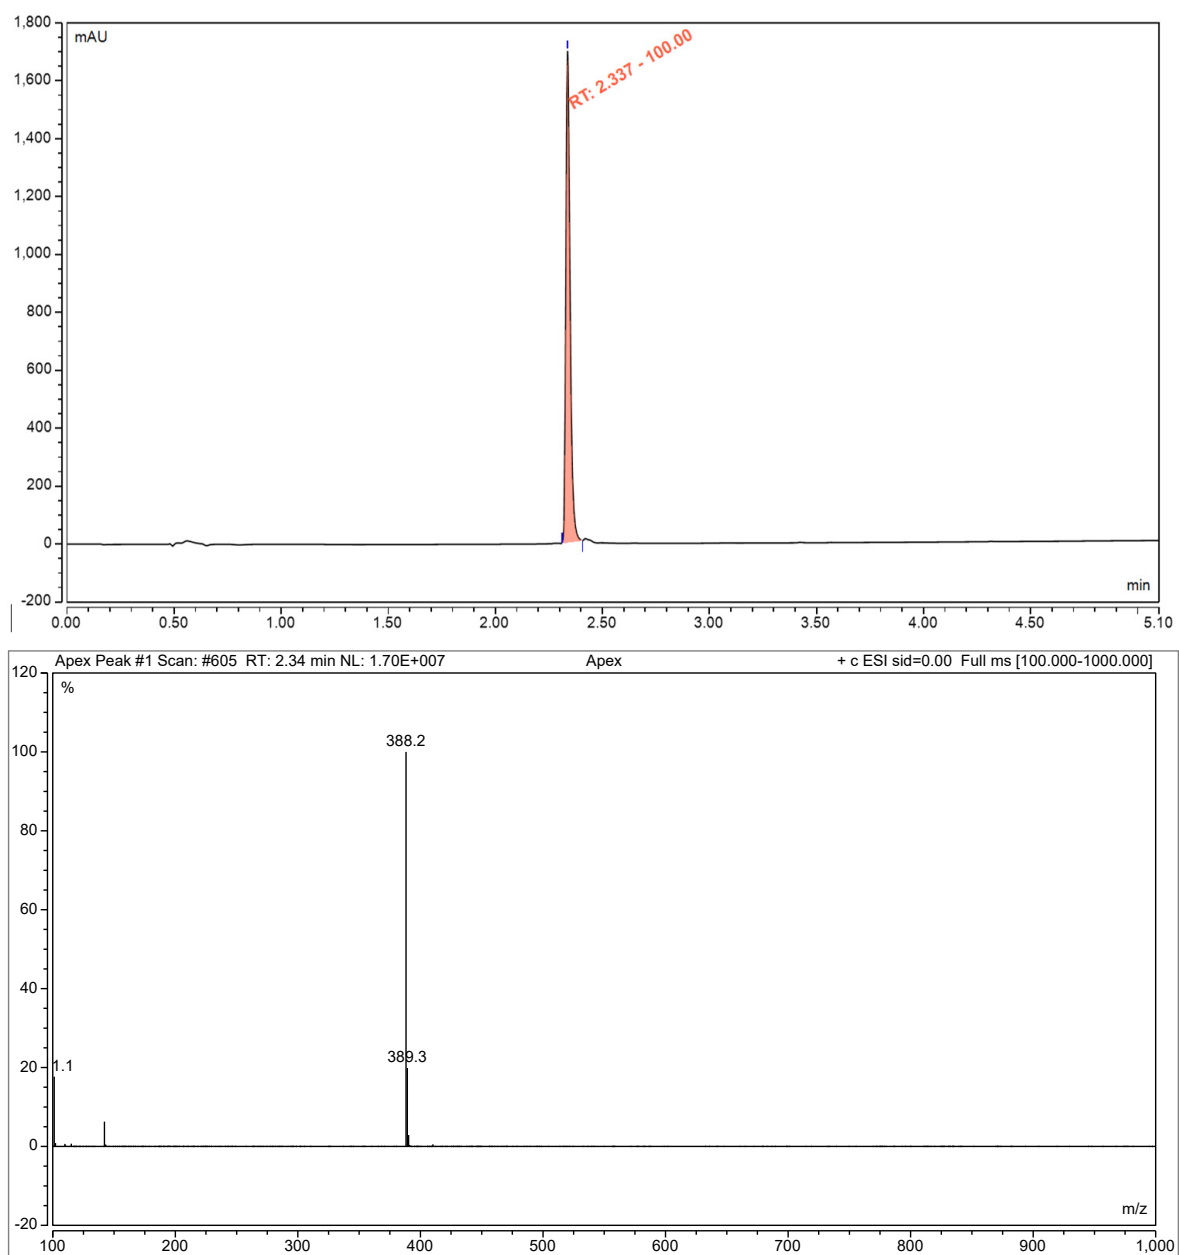

Figure S39. HPLC-MS UV chromatogram and positive ESI-MS of **9e**.

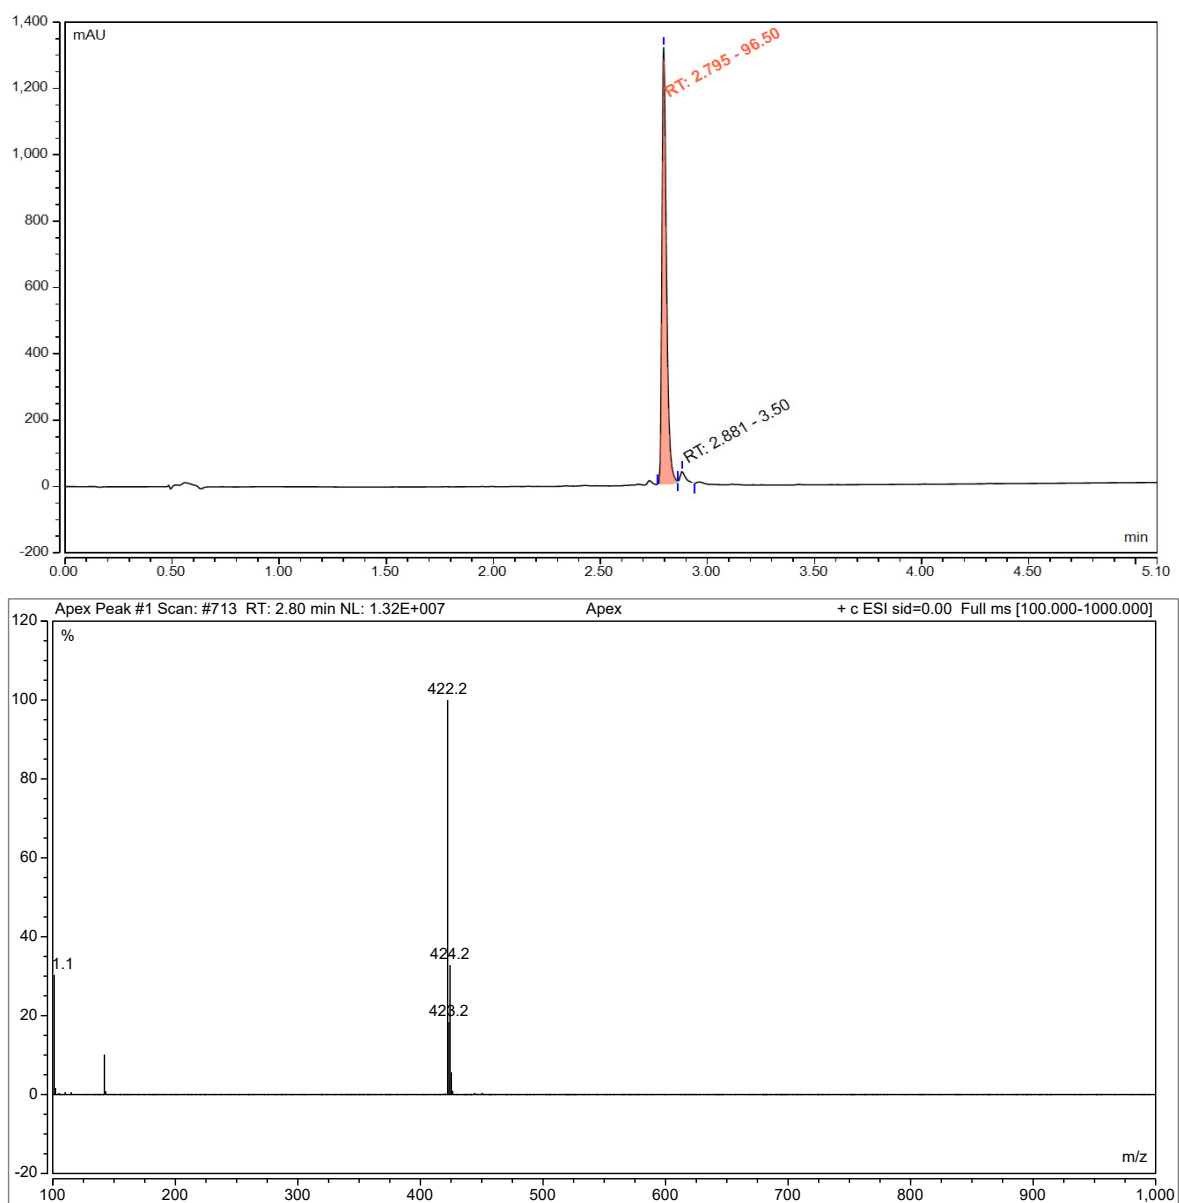

Figure S40. HPLC-MS UV chromatogram and positive ESI-MS of **9f**.

## S21

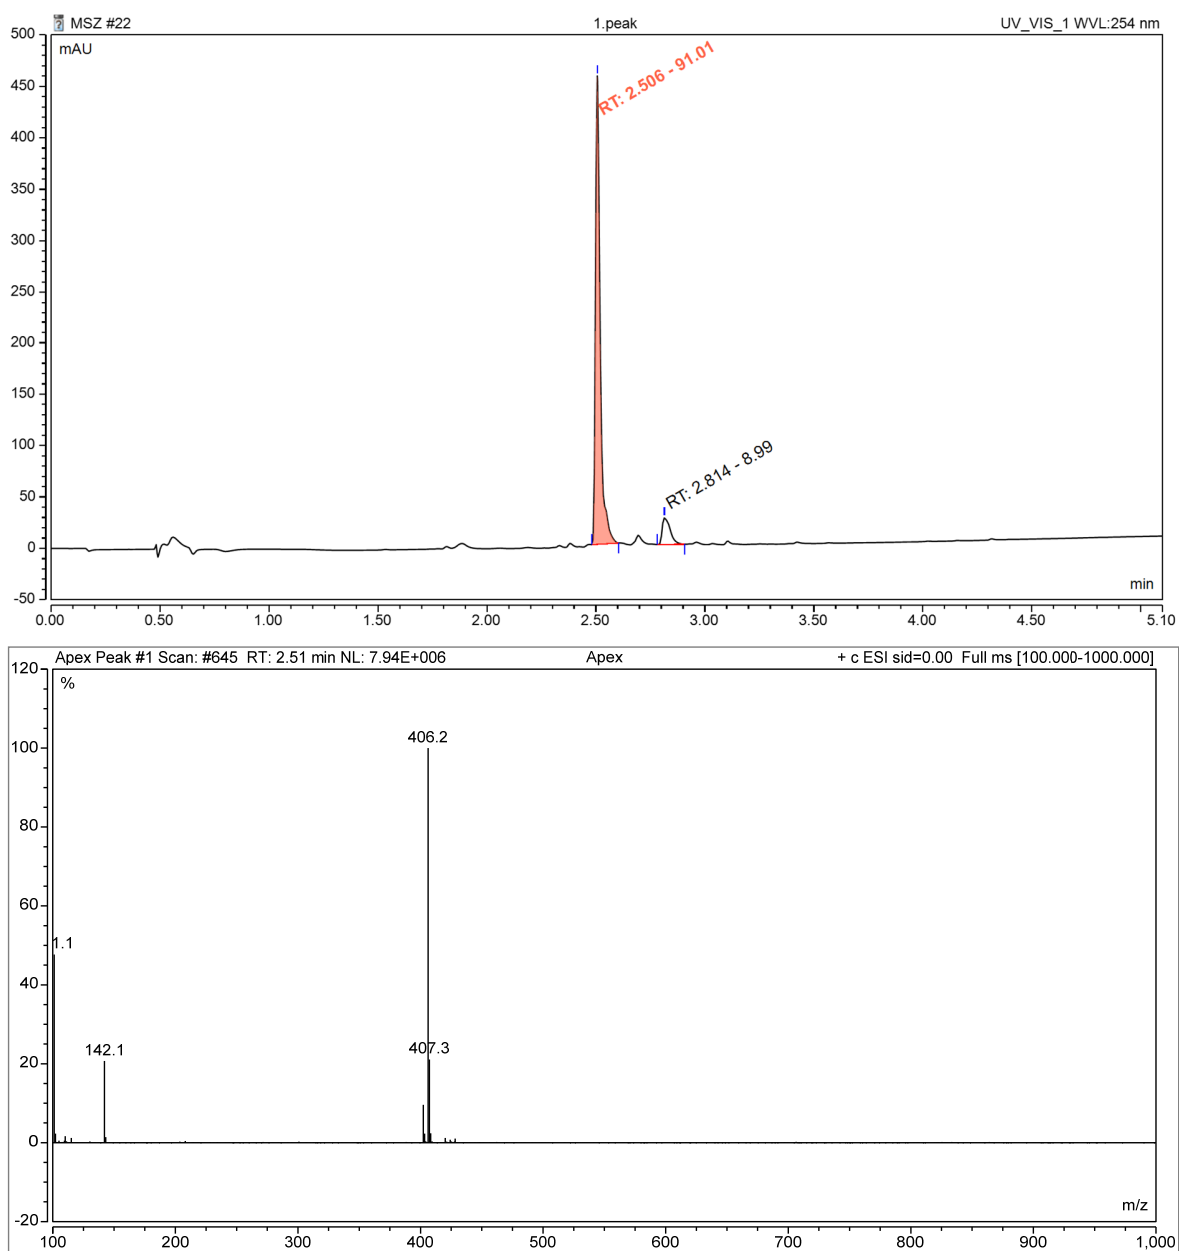

Figure S41. HPLC-MS UV chromatogram and positive ESI-MS of **9g**.

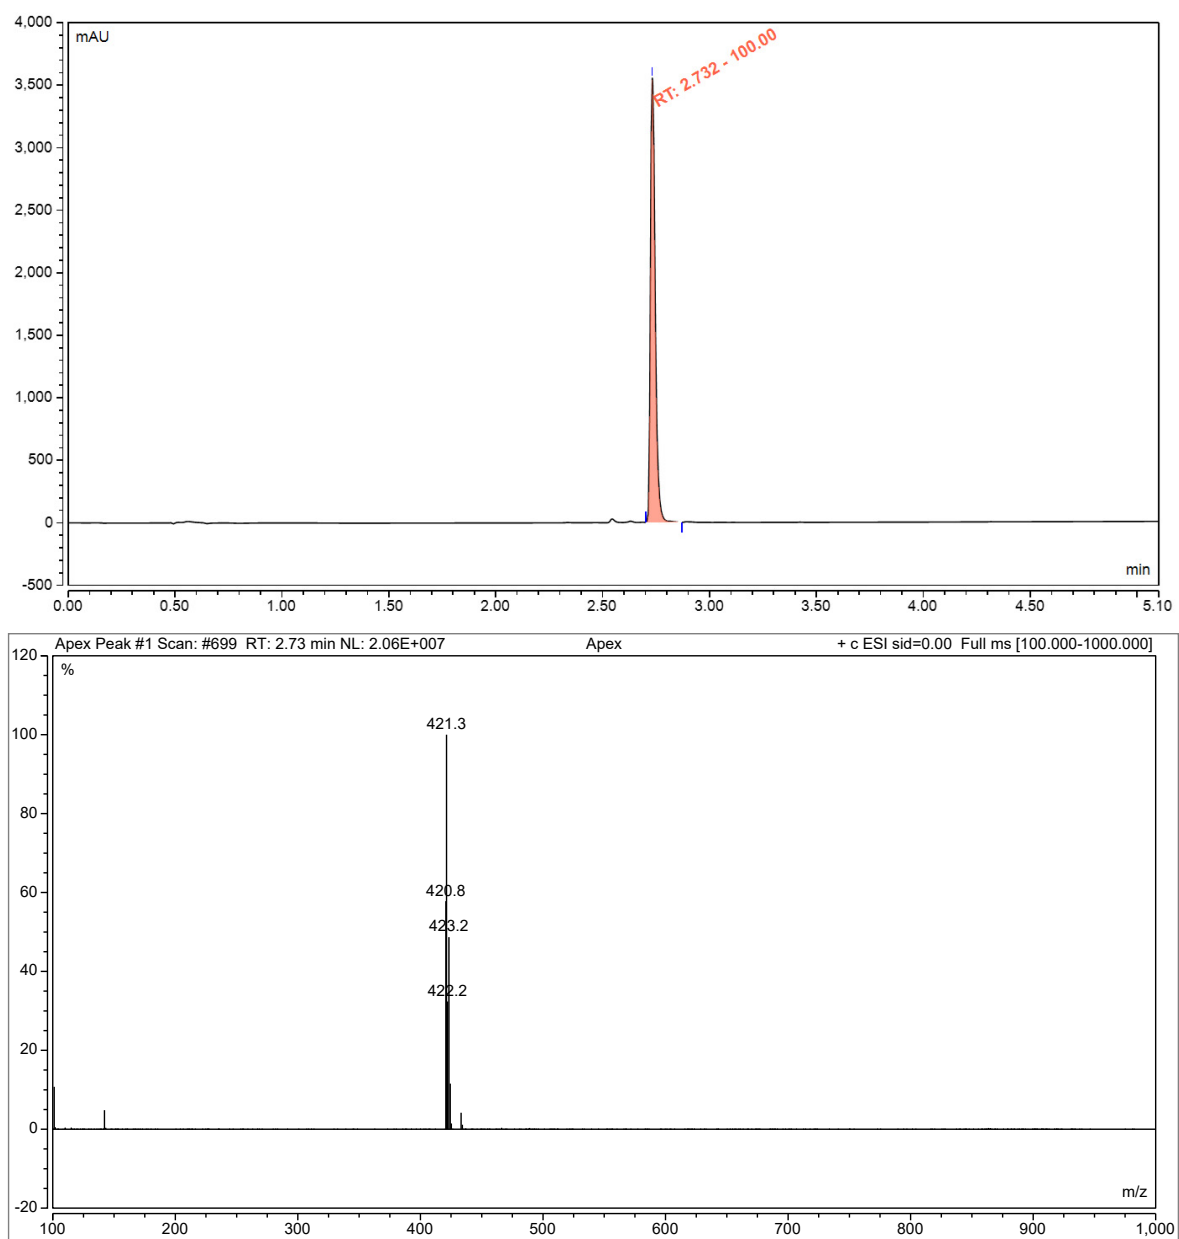

Figure S42. HPLC-MS UV chromatogram and positive ESI-MS of **9h**.

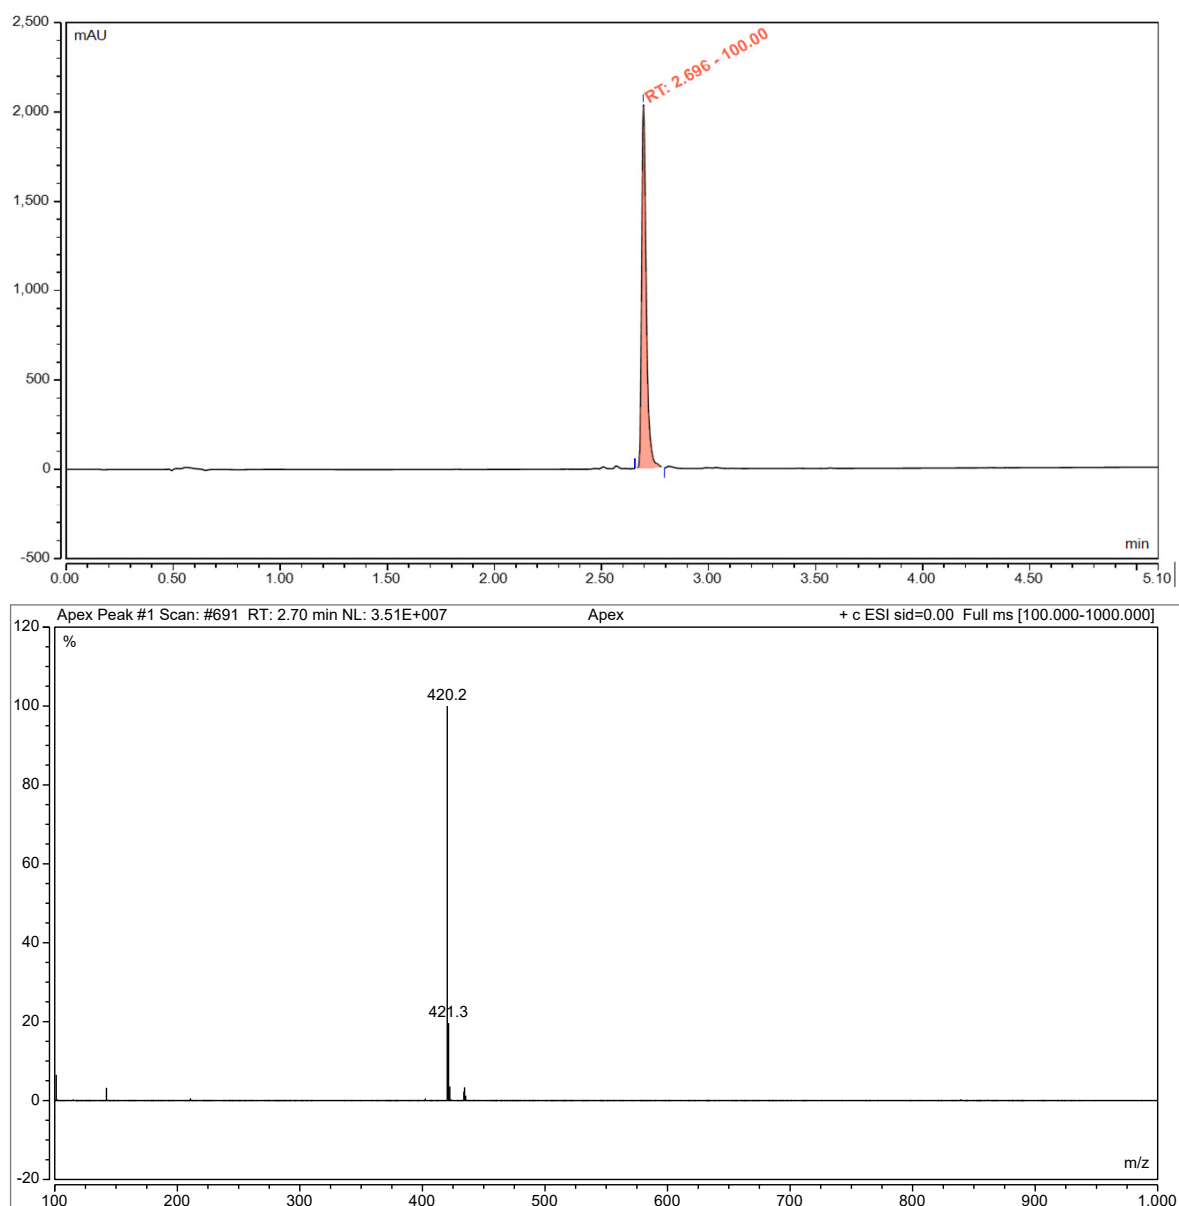

Figure S43. HPLC-MS UV chromatogram and positive-ESI MS of **9i**.

## 1.6 Synthesis of aryl substituents with an Fmoc-protected amino group

**N-Fmoc-2-aminobenzoic acid (SI-1).** To 2-aminobenzoic acid (274 mg, 2.0 mmol), Fmoc-Cl (517 mg, 2.0 mmol) was added, and the mixture was dissolved in dioxane (5 mL). Then, saturated aqueous sodium bicarbonate solution (0.1 mL) was added to the solution, and stirred overnight. The solution was extracted with saturated aqueous ammonium chloride solution and ethyl acetate (3 x 50 mL). The organic layers

were combined dried over sulfate and filtered. Then, the solvent was removed under reduced pressure. The compound was obtained as white solid and it was used without further purification (650 mg, 90%).  $^1\text{H}$  NMR (500 MHz,  $\text{DMSO}-d_6$ ):  $\delta$  11.21 (s, 1H), 8.14 (d,  $J$  = 8.6 Hz, 1H), 7.97 (dd,  $J$  = 7.9, 1.7 Hz, 1H), 7.92 (d,  $J$  = 7.5 Hz, 2H), 7.69 (d,  $J$  = 7.5 Hz, 2H), 7.53 (t,  $J$  = 7.8 Hz, 1H), 7.46–7.39 (m, 2H), 7.35 (td,  $J$  = 7.5, 1.2 Hz, 2H), 7.08 (t,  $J$  = 7.6 Hz, 1H), 4.48 (d,  $J$  = 6.8 Hz, 2H), 4.35 (t,  $J$  = 6.8 Hz, 1H); HRMS (ESI) ( $m/z$ ): calcd for  $\text{C}_{22}\text{H}_{16}\text{NO}_4$  358.1073, found 358.1083  $[\text{M} - \text{H}]^-$ .

***N*-Fmoc-2-amino-3-chlorobenzoic acid (SI-2).** To 2-amino-3-chlorobenzoic acid (348 mg, 2.0 mmol) Fmoc-Cl (517 mg, 2.0 mmol) was added and the mixture was dissolved in dioxane (5 mL). Then, saturated aqueous sodium bicarbonate solution (0.1 mL) was added to the solution, and stirred overnight. The solution was extracted with saturated aqueous ammonium chloride solution and ethyl acetate (3 x 50 mL). The organic layers were combined and dried over sodium sulfate and filtered. Then, the solvent was removed under reduced pressure. The compound was obtained as white solid and it was used without further purification (660 mg, 84%).  $^1\text{H}$  NMR (500 MHz,  $\text{DMSO}-d_6$ ):  $\delta$  13.04 (s, 1H), 7.96–7.80 (m, 2H), 7.83–7.70 (m, 2H), 7.71–7.53 (m, 1H), 7.51–7.14 (m, 6H), 4.36–4.29 (m, 2H), 4.29–4.23 (m, 1H); HRMS (ESI) ( $m/z$ ): calcd for  $\text{C}_{22}\text{H}_{17}\text{ClNO}_4$  394.0846, found 394.0839  $[\text{M} + \text{H}]^+$ .

***N*-Fmoc-2-amino-6-fluorobenzoic acid (SI-3).** To 2-amino-6-fluorobenzoic acid (310 mg, 2.0 mmol) Fmoc-Cl (517 mg, 2.0 mmol) was added and the mixture was dissolved in dioxane (5 mL). Then, saturated aqueous sodium bicarbonate solution (0.1 mL) was added to the solution, and stirred overnight. The solution was extracted with saturated aqueous ammonium chloride solution and ethyl acetate (3 x 50 mL). The organic layers were combined and dried over sodium sulfate and filtered. Then, the solvent was removed under reduced pressure. The compound was obtained as white solid and it was used without further purification (671 mg, 89%).  $^1\text{H}$  NMR (500 MHz,  $\text{acetone}-d_6$ ):  $\delta$  10.35 (s, 1H), 8.12 (d,  $J$  = 8.5 Hz, 1H), 7.88 (dd,  $J$  = 7.5, 3.6 Hz, 2H), 7.72 (d,  $J$  = 7.3 Hz, 2H), 7.59–7.54 (m, 1H), 7.43 (td,  $J$  = 7.5, 2.0 Hz, 2H), 7.35 (t,  $J$  = 7.3 Hz, 2H), 6.95–6.90 (m, 1H), 4.51 (dd,  $J$  = 7.0, 2.5 Hz, 3H), 4.37–4.34 (m, 1H); HRMS (ESI) ( $m/z$ ): calcd for  $\text{C}_{22}\text{H}_{15}\text{FNO}_4$  376.0990, found 376.0985  $[\text{M} - \text{H}]^-$ .



## 1.7 NMR-based structure elucidation

### 1.7.1 $^1\text{H}$ and $^{13}\text{C}$ -spectra of compounds 1 and 3

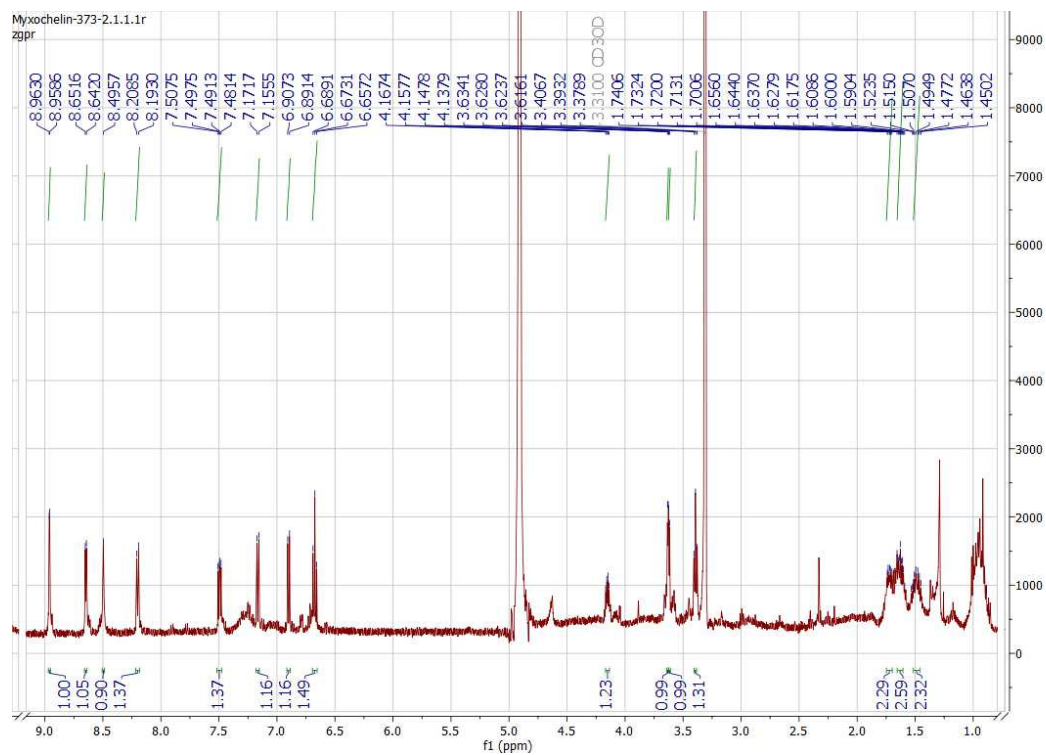

Figure S44.  $^1\text{H}$  NMR spectrum of **1** in methanol- $d_4$ .

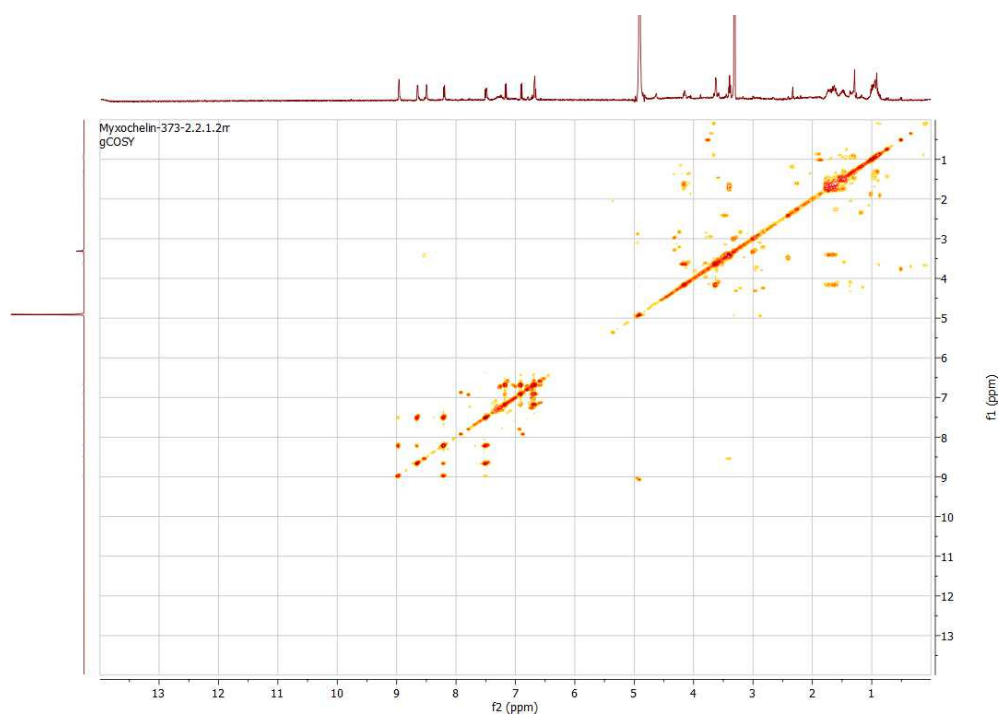

Figure S45.  $^1\text{H}$ - $^1\text{H}$  COSY spectrum of **1** in methanol- $d_4$ .

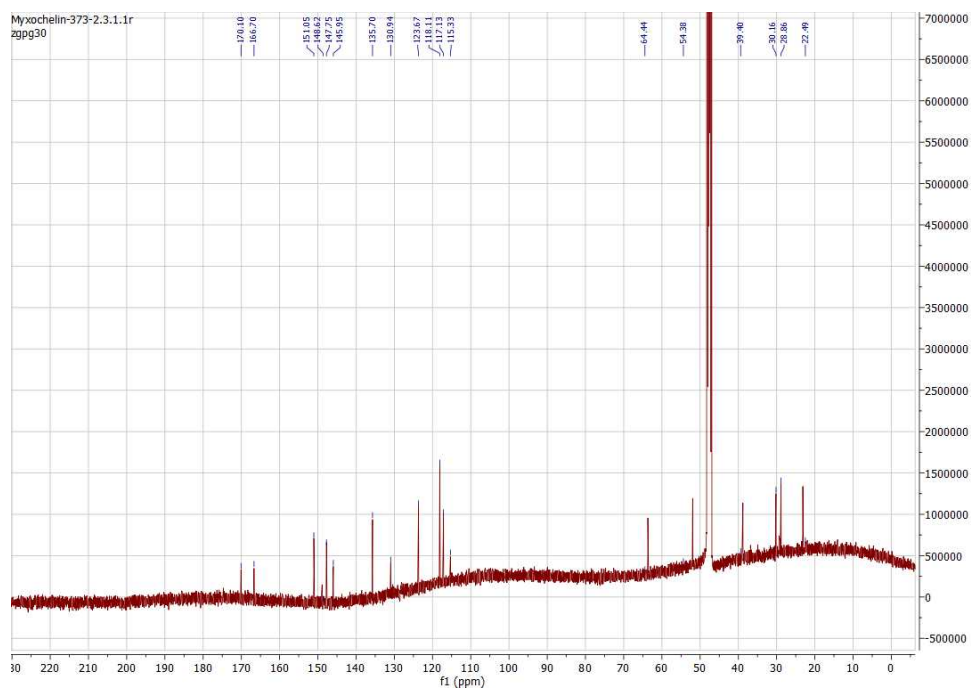

Figure S46.  $^{13}\text{C}$  NMR spectrum of **1** in methanol- $d_4$ .

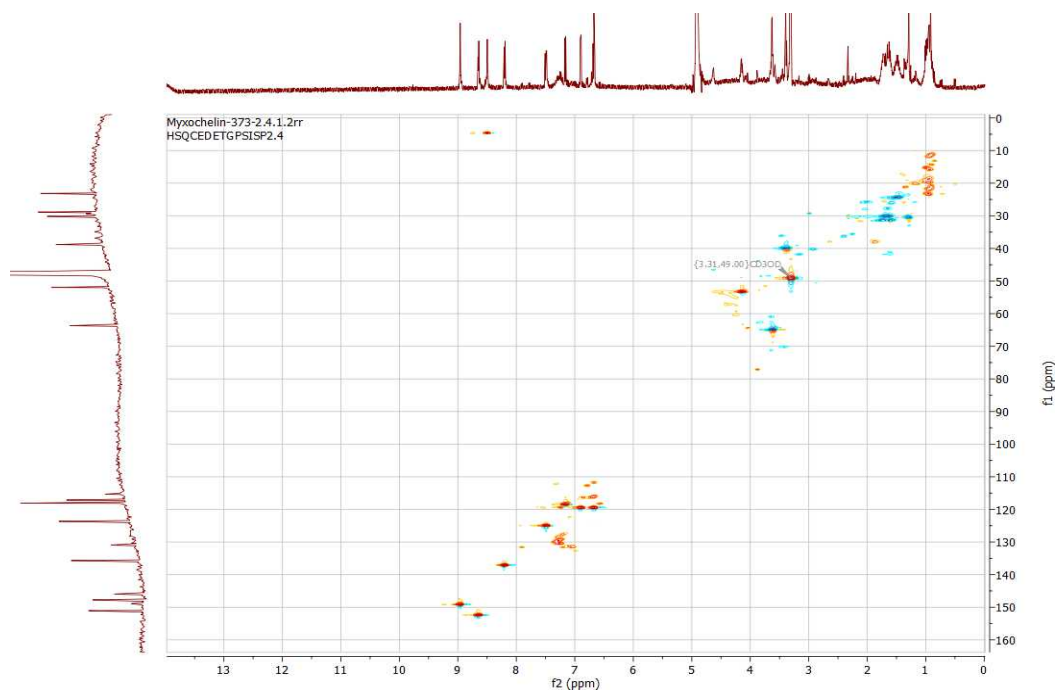

Figure S47. HSQC spectrum of **1** in methanol-*d*<sub>4</sub>.

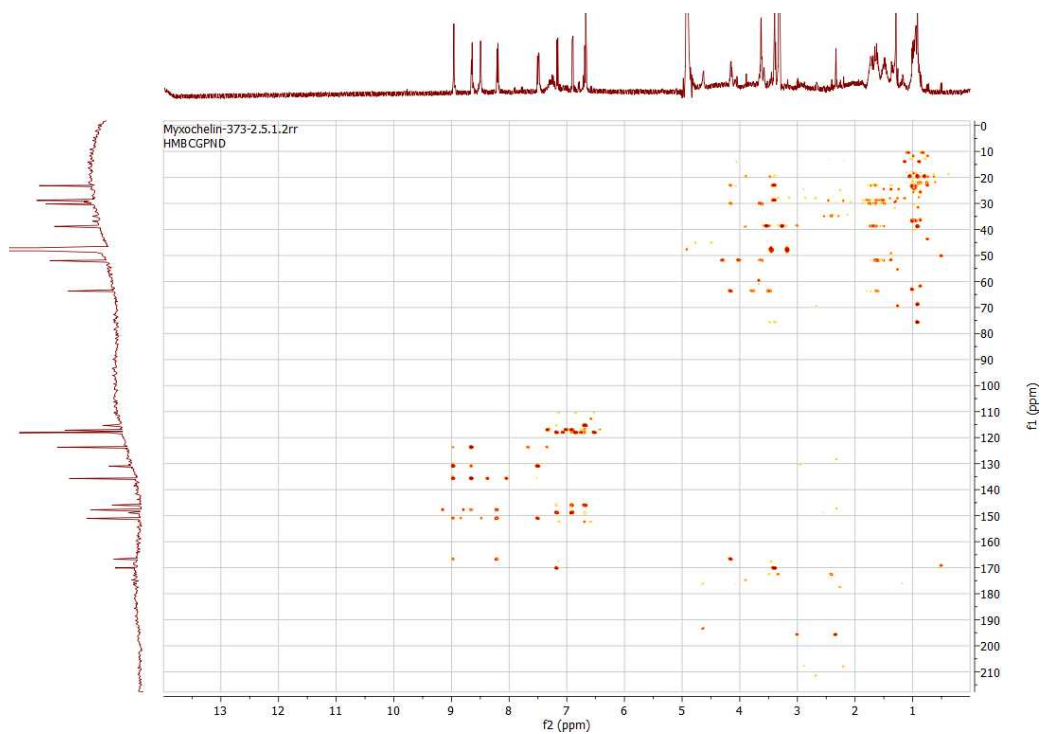

Figure S48. HMBC spectrum of **1** in methanol-*d*<sub>4</sub>.

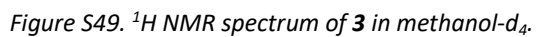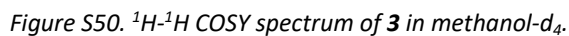

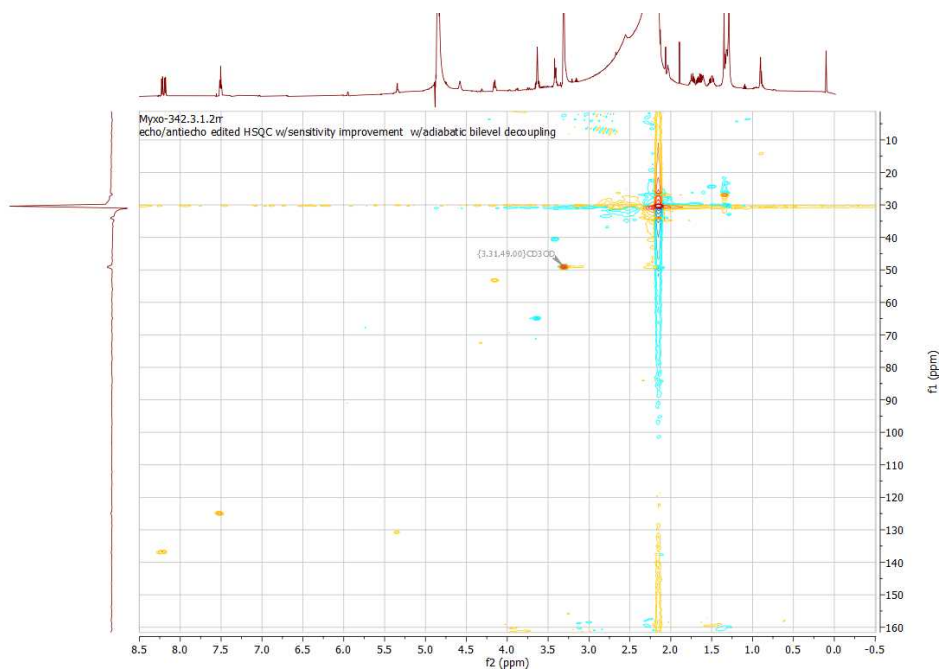

Figure S51. HSQC spectrum of **3** in methanol- $d_4$ .

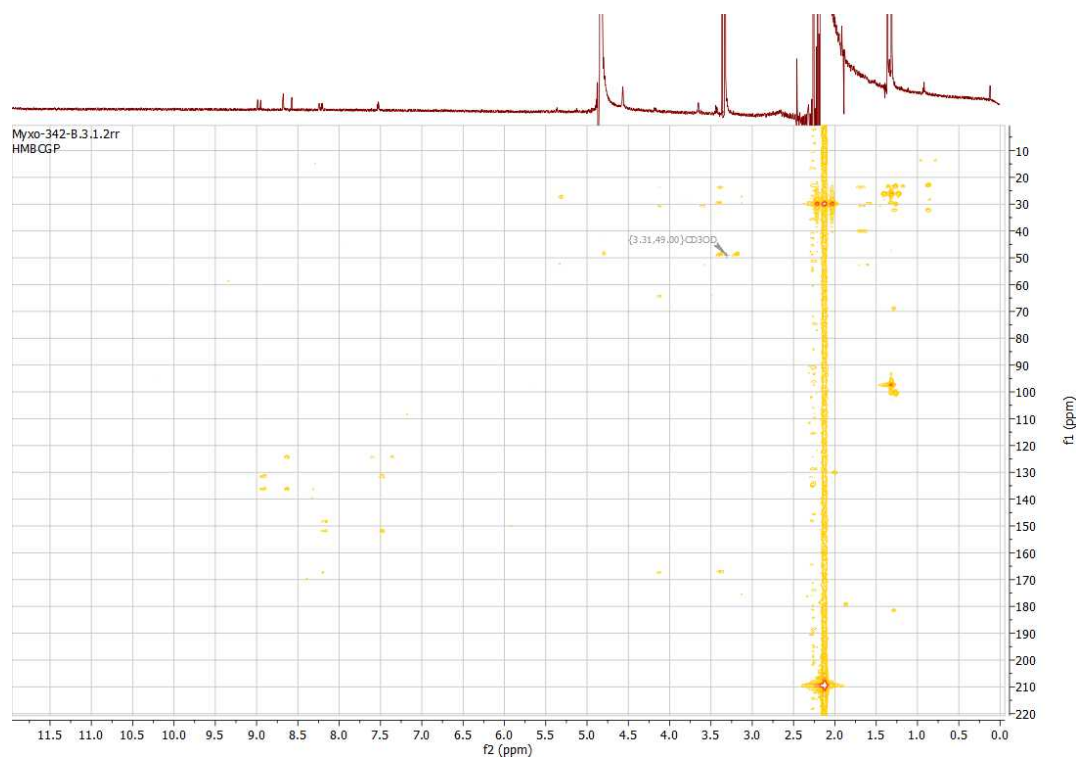

Figure S52. HMBC spectrum of **3** in methanol- $d_4$ .

1.7.2  $^1\text{H}$  and  $^{13}\text{C}$  spectra of the synthetic compounds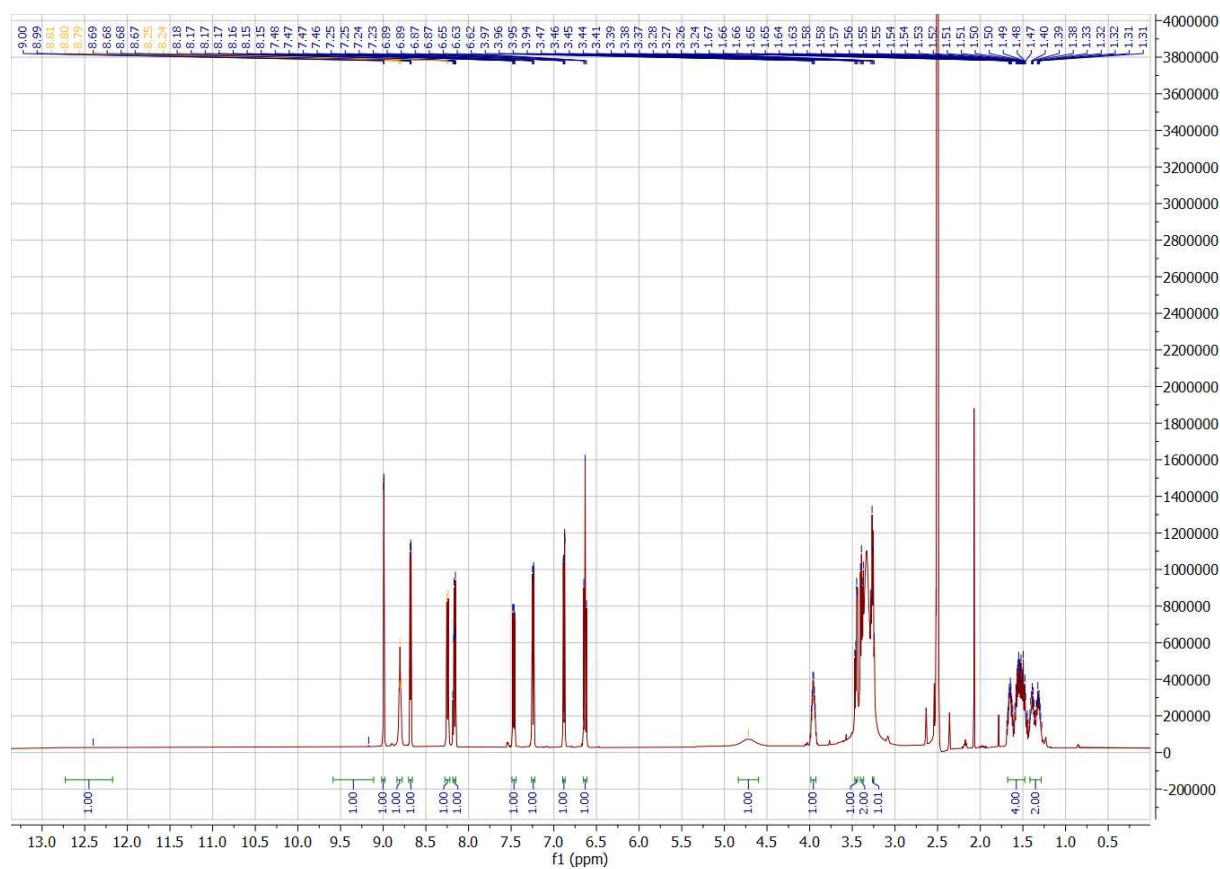Figure S53.  $^1\text{H}$  NMR spectrum of **9a** in  $\text{DMSO-d}_6$ .

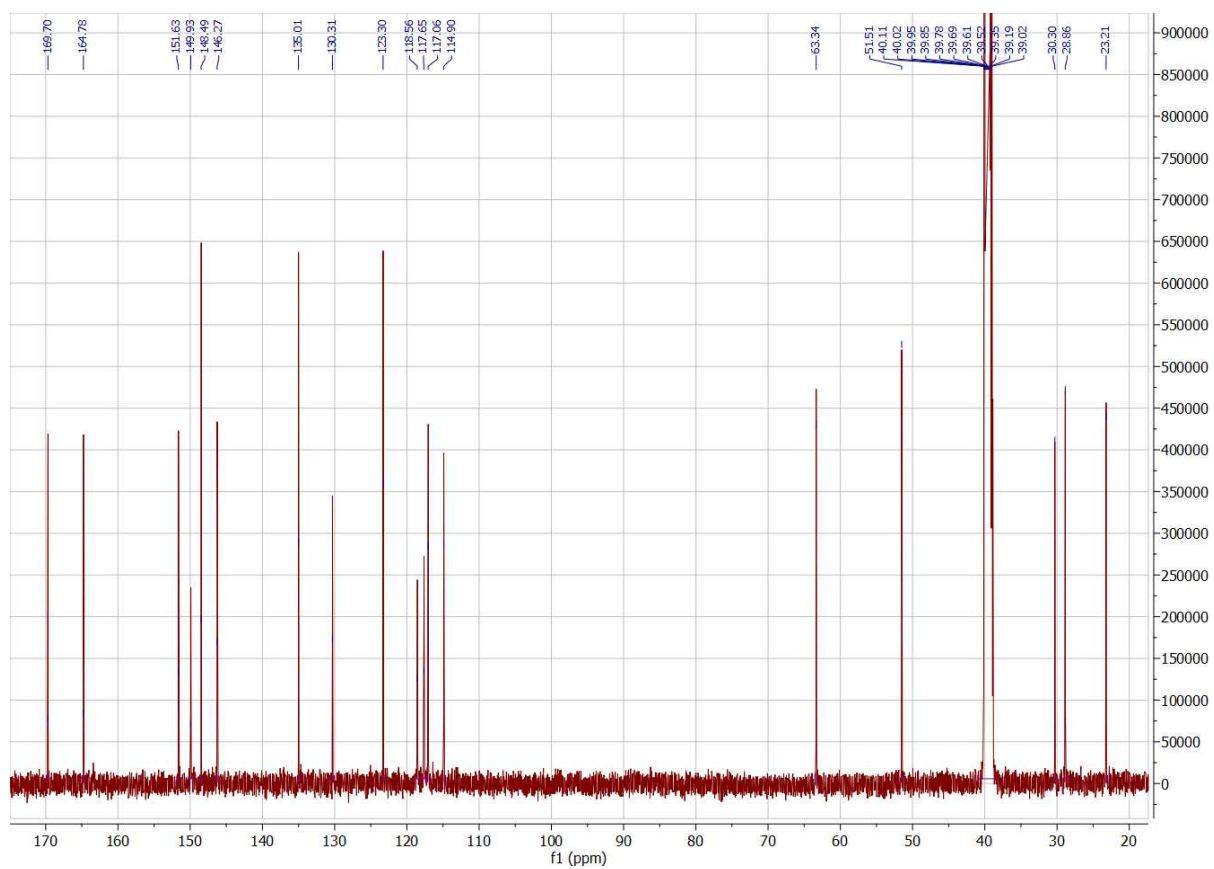

Figure S54. <sup>13</sup>C NMR spectrum of 9a in DMSO-d<sub>6</sub>.

Figure S55.  $^1\text{H}$  NMR spectrum of **9b** in DMSO- $d_6$ .



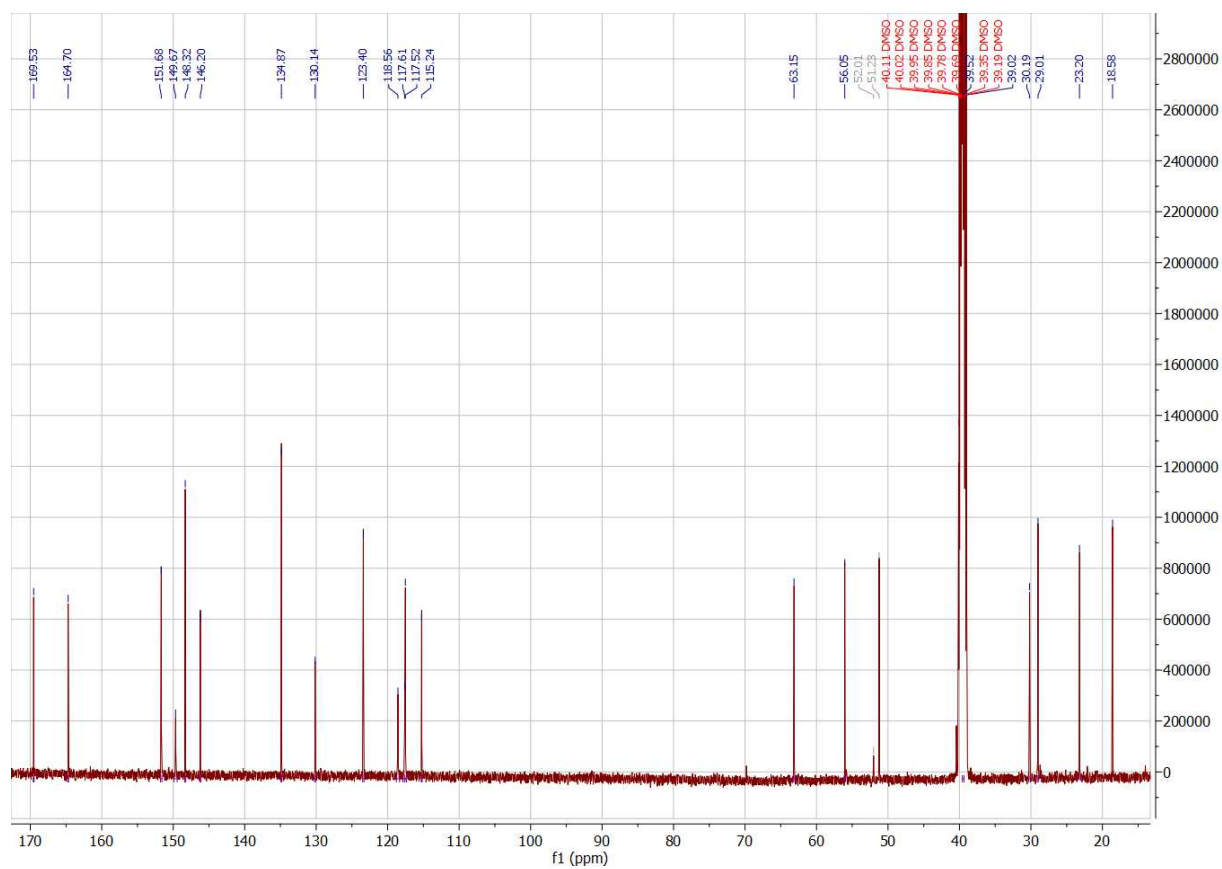

Figure S56. <sup>13</sup>C NMR spectrum of **9b** in DMSO-d<sub>6</sub>.

Figure S57.  $^1\text{H}$  NMR spectrum of **9c** in  $\text{DMSO-d}_6$ .

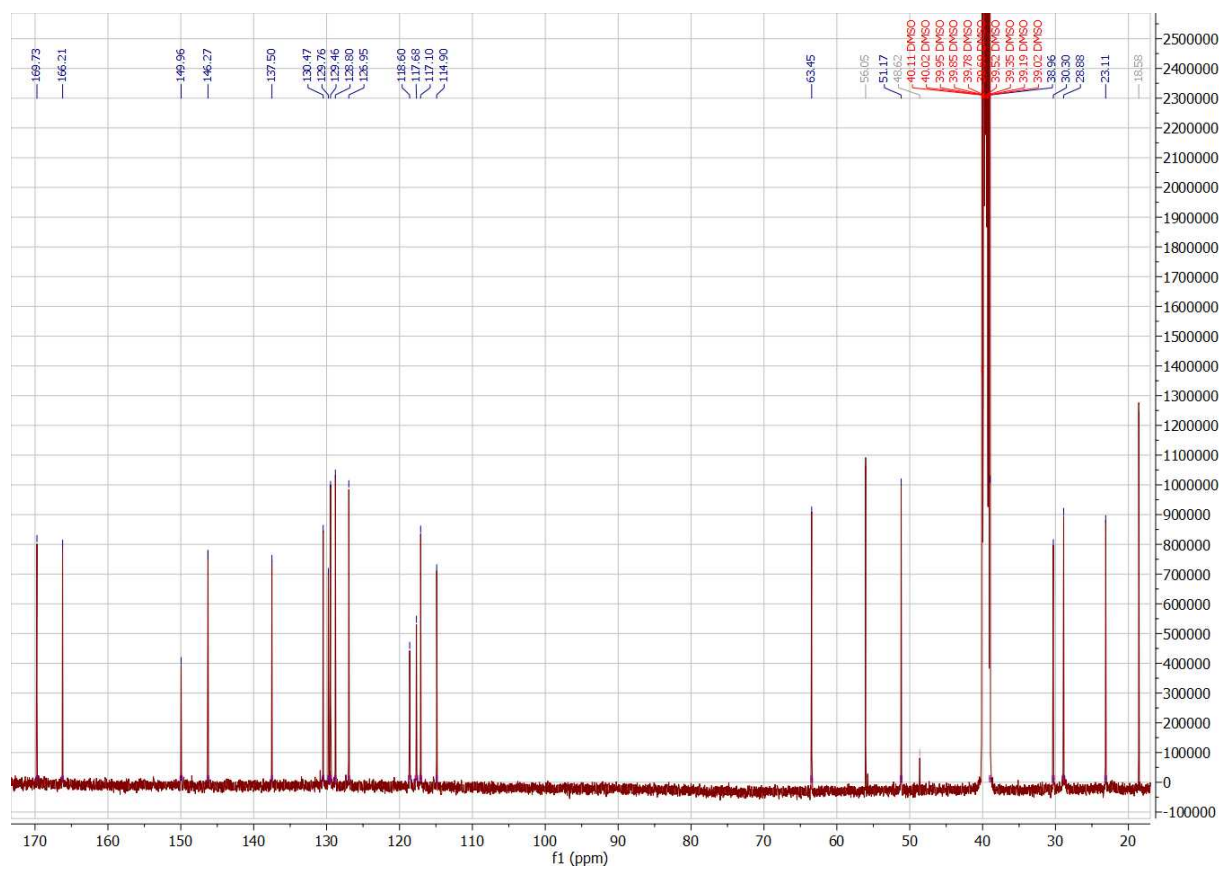

Figure S58. <sup>13</sup>C NMR spectrum of **9c** in DMSO-*d*<sub>6</sub>.

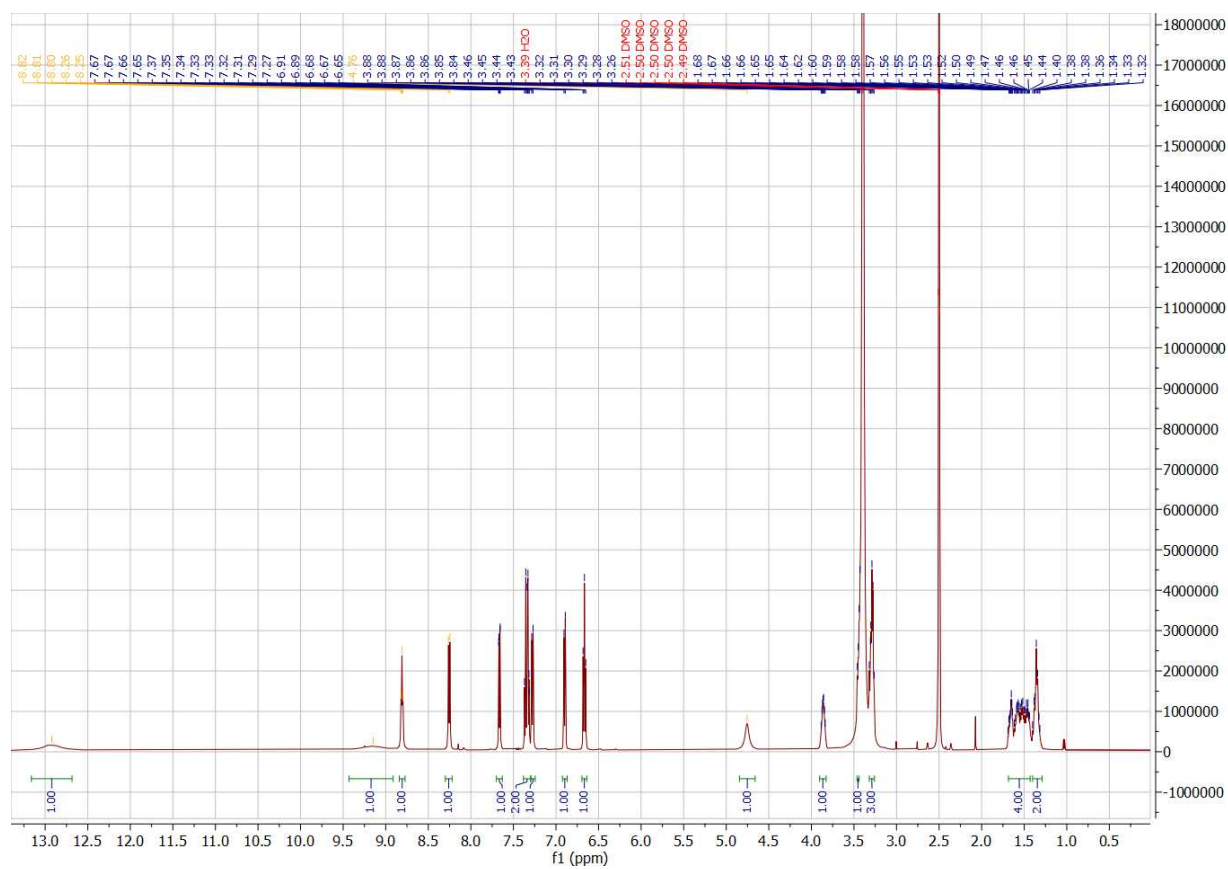

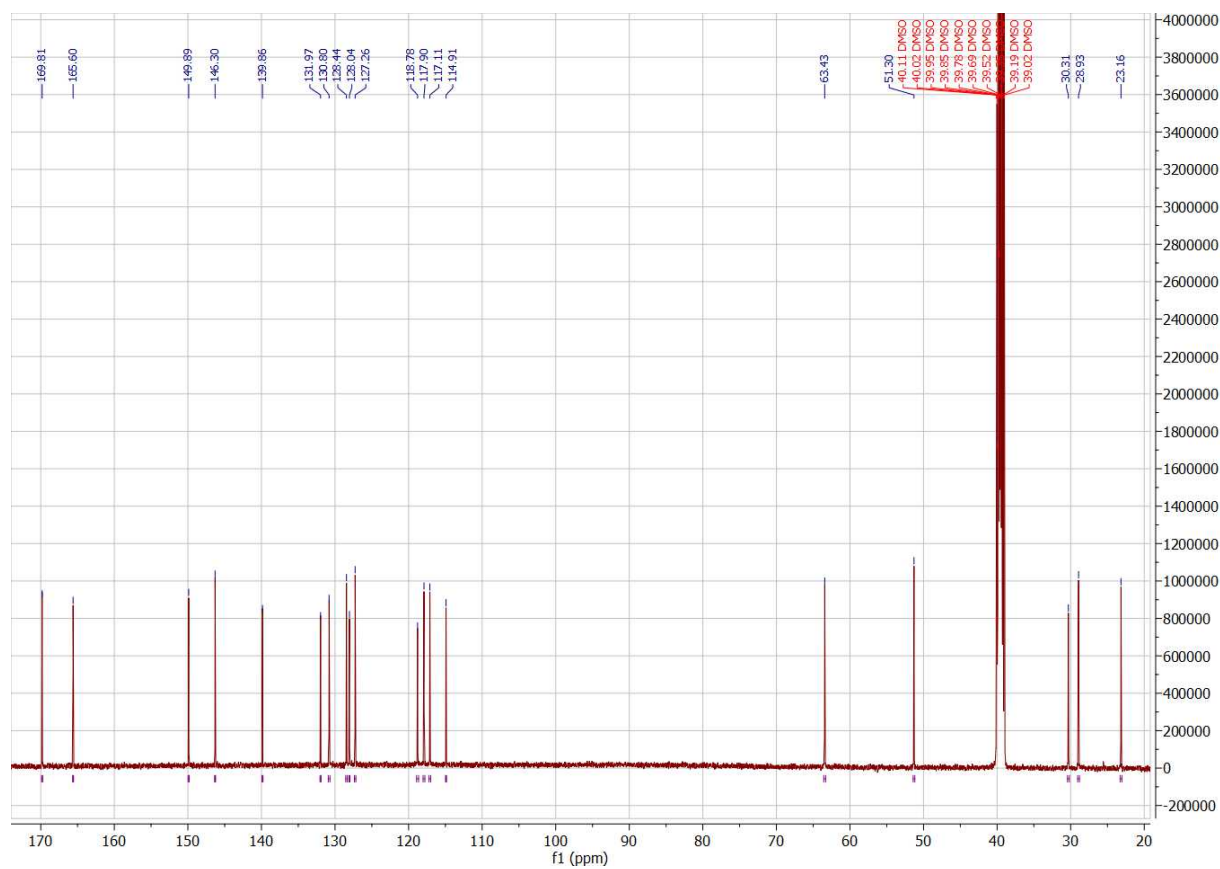

Figure S60. <sup>13</sup>C NMR spectrum of **9d** in DMSO-d<sub>6</sub>.

Figure S61.  $^1\text{H}$  NMR spectrum of **9e** in DMSO- $d_6$ .

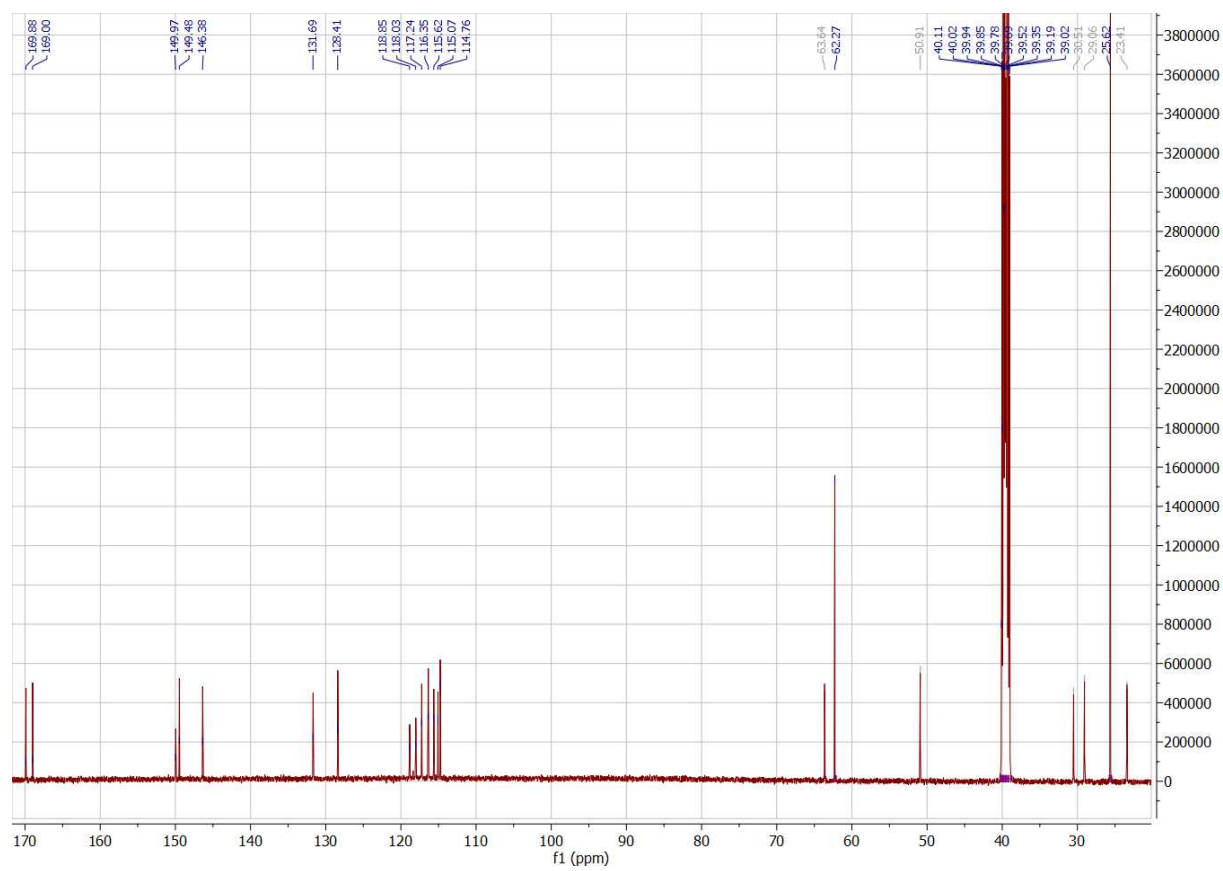

Figure S62. <sup>13</sup>C NMR spectrum of **9e** in DMSO-d<sub>6</sub>.

Figure S63.  $^1\text{H}$  NMR spectrum of **9f** in  $\text{DMSO-d}_6$ .



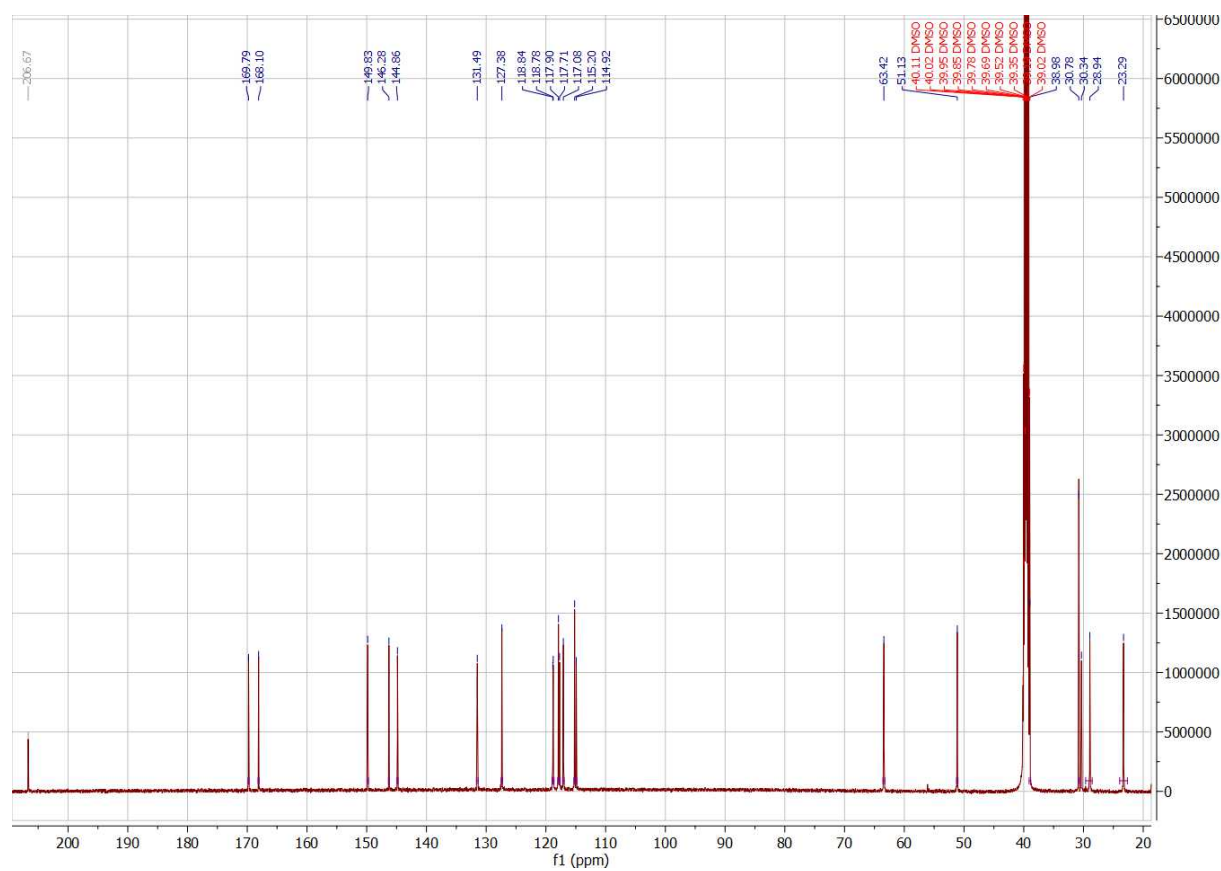

Figure S64. <sup>13</sup>C NMR spectrum of **9f** in DMSO-d<sub>6</sub>.

Figure S65.  $^1\text{H}$  NMR spectrum of **9g** in DMSO- $d_6$ .

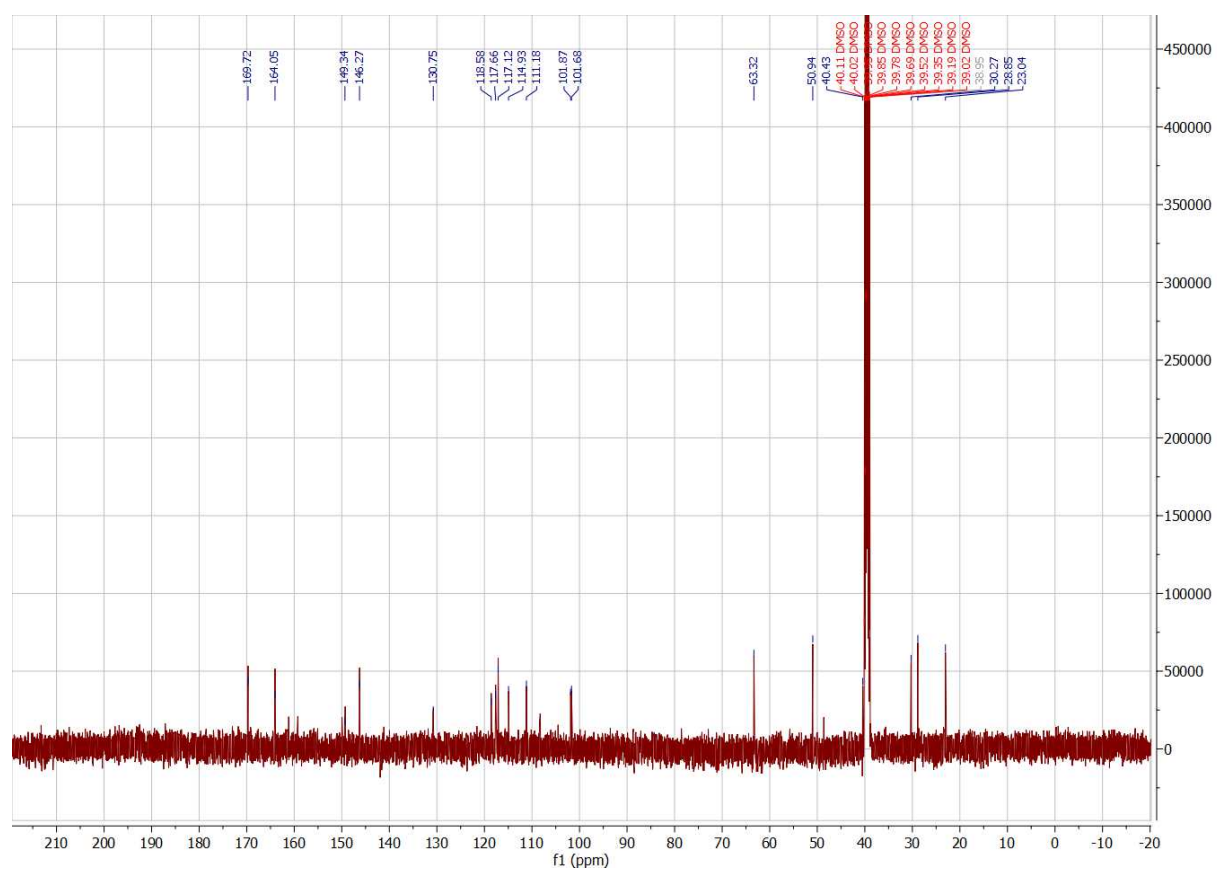

Figure S66. <sup>13</sup>C NMR spectrum of **9g** in DMSO-d<sub>6</sub>.

Figure S67.  $^1\text{H}$  NMR spectrum of **9h** in DMSO- $d_6$ .

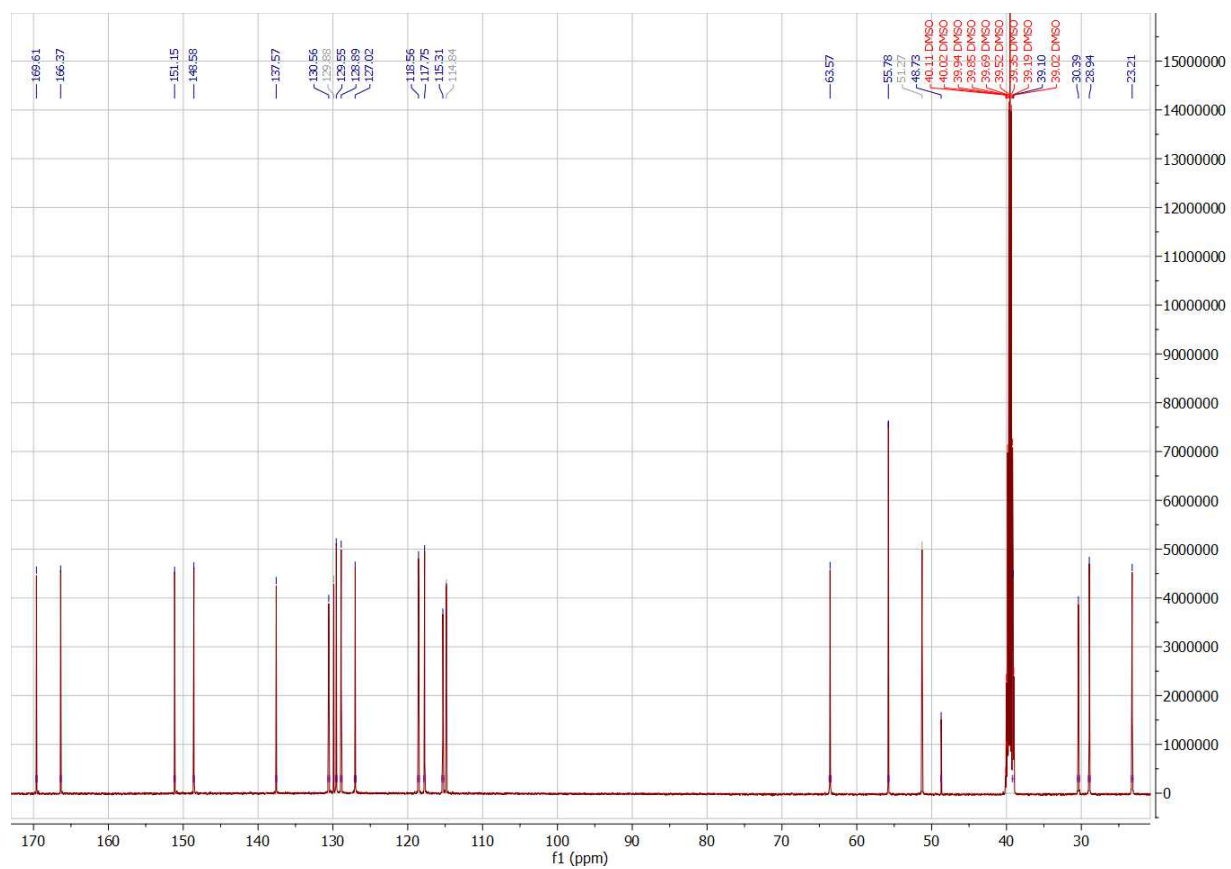

Figure S68. <sup>13</sup>C NMR spectrum of **9h** in DMSO-d<sub>6</sub>.

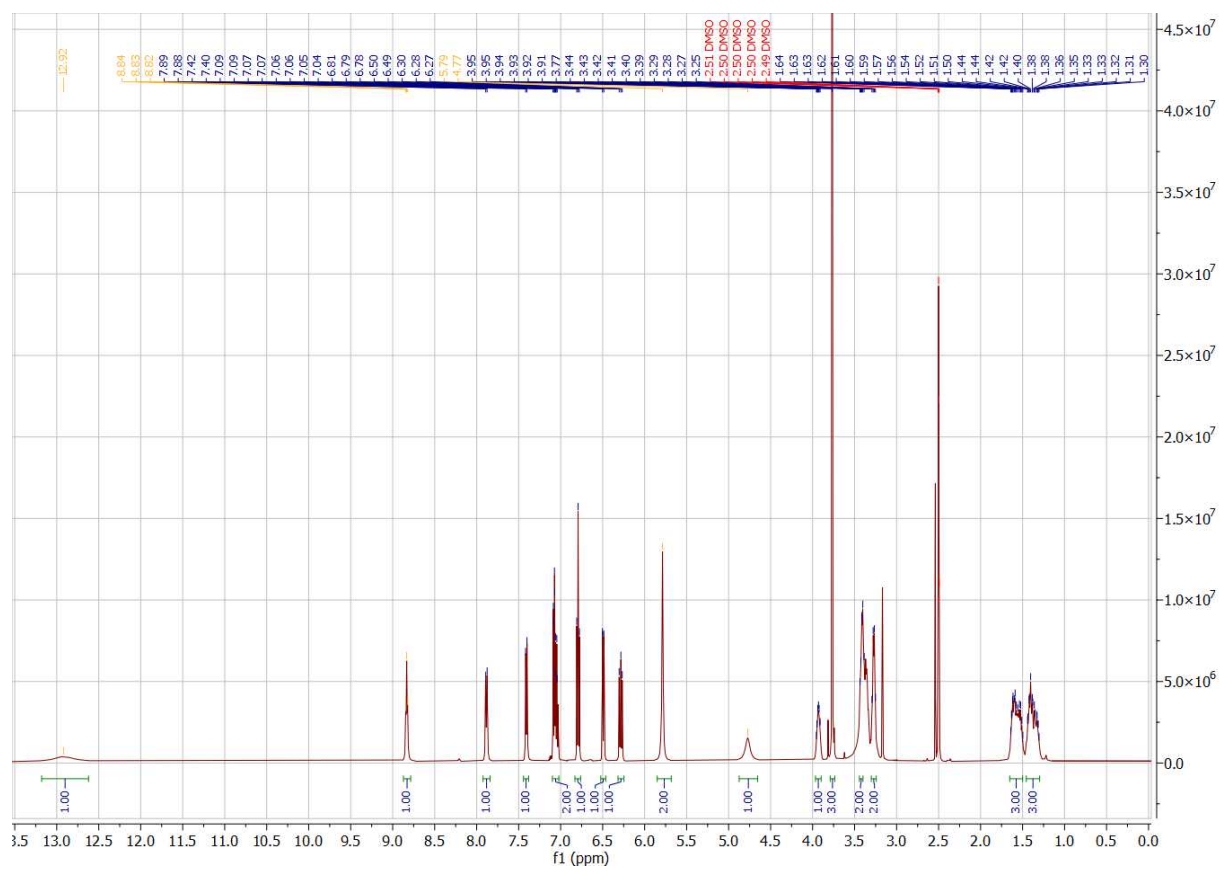

Figure S69. <sup>1</sup>H NMR spectrum of **9i** in DMSO-*d*<sub>6</sub>.

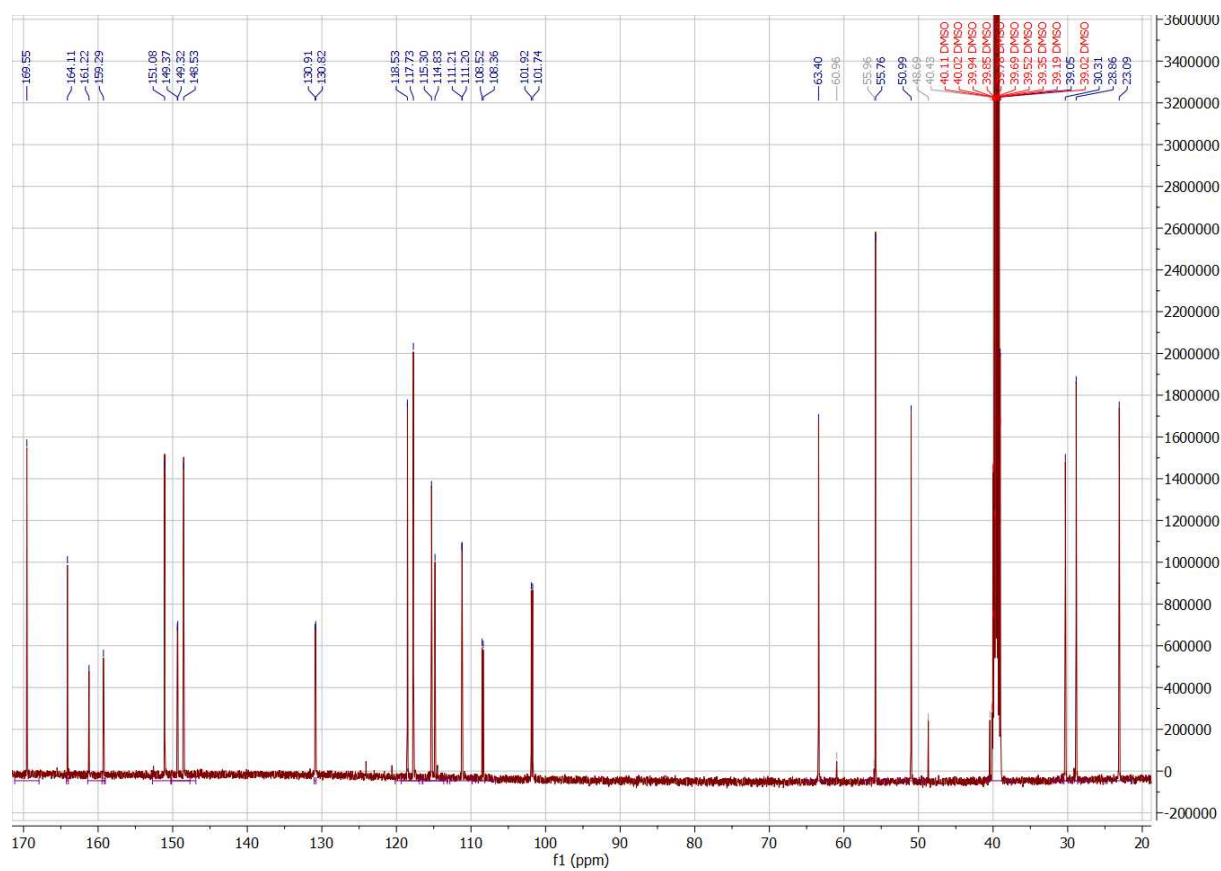

Figure S70. <sup>13</sup>C NMR spectrum of **9i** in DMSO-*d*<sub>6</sub>.

## 2 *In-silico* analysis of the myxochelin N1–N3 biosynthesis

### 2.1 Metabolome database search of 1–3

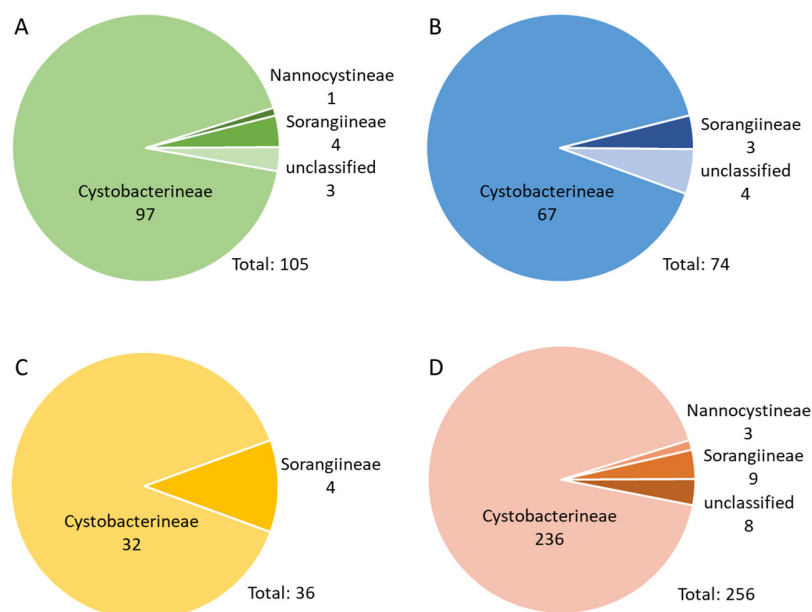

Figure S71. Alternative producers of 1–3 (A–C) and myxochelin A (D) from our in-house metabolome database sorted by suborder. Search parameters: exact mass deviation <5ppm, retention time deviation <0.3min, area threshold  $3 \times 10^4$ . The decreasing number of hits from 1 to 3 is most likely due to the threshold of the peak finding algorithm.

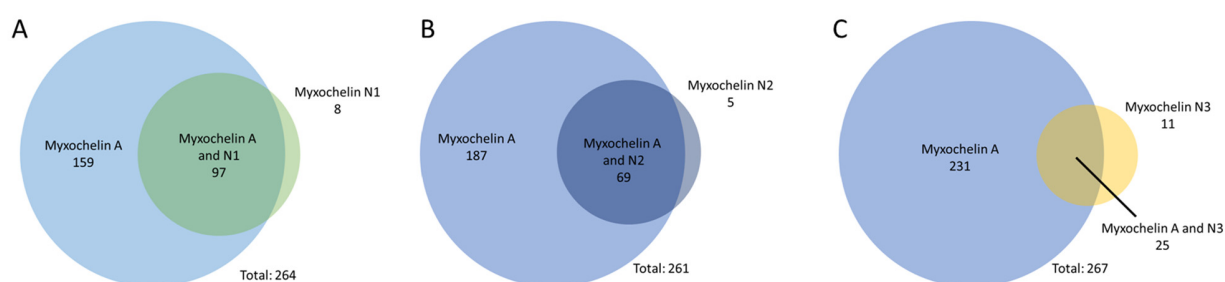

Figure S72. Venn Diagrams of alternative producers of 1–3 (A–C) and of Myxochelin A from our in-house metabolome database. Search parameters: exact mass deviation <5ppm, retention time deviation <0.3min, area threshold  $3 \times 10^4$ .

The strains that were found to produce 1, 2, and/or 3, but not myxochelin A were manually screened for presence of 1–3 and myxochelin A. The 24 hits refer to 22 myxobacterial metabolomes in total. Out of these, 10 hits were found to produce myxochelin A and 1, 2, and/or 3 and 12 hits were found to produce neither 1–3 nor myxochelin A. No strain was observed to produce 1, 2, and/or 3 in absence of myxochelin A.



## 2.2 Analysis of the myxochelin BGC

Every coding sequence in the myxochelin biosynthesis gene cluster of MCy9049 was extracted translated and searched with the blastp algorithm against the NCBI RefSeq non-redundant protein sequence database.[1] MxcA (NADP-dependent alcohol oxidoreductase) and MxcB (removal of iron from siderophore complex) are found outside the myxochelin regulon.

Table S1. Tabulated blastP results for the CDS regions present in the MCy9049 myxochelin biosynthetic gene cluster

| CDS Name             | Length [AA] | Closest homologue [Organism of origin]                                           | Identity [%] and alignment length [AA] | Proposed function    | Accession Nr. |
|----------------------|-------------|----------------------------------------------------------------------------------|----------------------------------------|----------------------|---------------|
| <b><i>mxuC</i></b>   | 280         | 2,3-dihydro-2,3-dihydroxybenzoate dehydrogenase [Coralloccoccus]                 | 97.3 / 257                             |                      | WP_120546994  |
| <b><i>mxuD</i></b>   | 429         | isochorismate synthase Dhbc [Coralloccoccus sp. NCSPR001]                        | 95.6 / 429                             |                      | WP_206795025  |
| <b><i>mxuE</i></b>   | 544         | (2,3-dihydroxybenzoyl)adenylate synthase [Coralloccoccus interemptor]            | 98.3 / 544                             |                      | WP_121769586  |
| <b><i>mxuF</i></b>   | 301         | isochorismatase family protein [Coralloccoccus sp. AB049A]                       | 98.0 / 301                             | aryl carrier protein | WP_121723307  |
| <b><i>mxuG</i></b>   | 1576        | myxochelin non-ribosomal peptide synthetase MxcG [Coralloccoccus sp. AB049A]     | 92.6 / 913                             |                      | WP_121723308  |
| <b><i>aroAA5</i></b> | 426         | 3-deoxy-7-phosphoheptulonate synthase [Coralloccoccus sp. AB049A]                | 99.3 / 426                             | DAHP synthase        | WP_121723309  |
| <b><i>mxuH</i></b>   | 856         | TonB-dependent siderophore myxochelin receptor MxcH [Coralloccoccus interemptor] | 97.0 / 856                             |                      | WP_121769582  |
| <b><i>mxuI</i></b>   | 422         | hypothetical protein [Coralloccoccus interemptor]                                | 92.9 / 422                             | unknown              | WP_121769581  |
| <b><i>mxuK</i></b>   | 405         | myxochelin export MFS transporter MxcK [Coralloccoccus sp. AB049A]               | 96.3 / 405                             |                      | WP_121725177  |
| <b><i>mxuL</i></b>   | 427         | myxochelin B biosynthesis transaminase MxcL [Coralloccoccus interemptor]         | 98.1 / 427                             |                      | WP_121769587  |

Table S2. A-domain specificity codes for mxcE homologs from NRPSpredictor2[2]. Prediction for all hits: dihydroxybenzoic acid or salicylic acid

| CDS Name    | Organism of origin                         | 8 angstrom signature code           | Stachelhaus code |
|-------------|--------------------------------------------|-------------------------------------|------------------|
| <i>entE</i> | <i>Escherichia coli</i> K12                | SRSIYAMSSPGGALQVGGAQQVFGMAEGLVNYTR  | AMPAQGVVNK       |
| <i>dhbE</i> | <i>Bacillus subtilis</i> subsp. 168        | SRSLYPLSSPGGALQVGGAQQVFGMAEGLVNYTR  | PLPAQGVVNK       |
| <i>mxcE</i> | <i>Corallococcus</i> sp. MCy9049           | SASLFPLSSPGGALQVGGAQQVFGMAEGLVNYTR  | PLPAQGVVNK       |
| <i>mxcE</i> | <i>Archangium gephyra</i> DSM 2261         | SASLFPLSSPGGALQVGGAQQVFGMAEGLVNYTR  | PLPAQGVVNK       |
| <i>mxcE</i> | <i>Archangium</i> sp. Cb G35               | SGSLFPLSSPGGALQVGGAQQVFGMAEGLVNYTR  | PLPAQGVVNK       |
| <i>mxcE</i> | <i>Corallococcus coralloides</i> DSM 2259  | SASLFPMSSPGGALQVGGAQQVFGMAEGLVNYTR  | PMPAQGVVNK       |
| <i>mxcE</i> | <i>Corallococcus</i> sp. H22C18031201      | SASLFPLSSPGGALQVGGAQQVFGMAEGLVNYTR  | PLPAQGVVNK       |
| <i>mxcE</i> | <i>Cystobacter fuscus</i> DSM 2262         | SGSLFPLSSPGGALQVGGAQQVFGMAEGLVNYTR  | PLPAQGVVNK       |
| <i>mxcE</i> | <i>Cystobacter violaceus</i> Cb vi76       | SGSLFPLSSPGGALQVGGAQQVFGMAEGLVNYTR  | PLPAQGVVNK       |
| <i>mxcE</i> | <i>Haliangium ochraceum</i> DSM 14365      | SASLFTLSSPGGALQVGGAQQVFGMAEGLVNYTR  | TLPAQGVVNK       |
| <i>mxcE</i> | <i>Hyalangium minutum</i> DSM 14724        | SASLFPMSSPGGALQVGGAQQVYFGMAEGLVNYTR | PMPAQGVVNK       |
| <i>mxcE</i> | <i>Myxococcus fulvus</i> 124B02            | SASLFPMSSPGGALQVGGAQQVFGMAEGLVNYTR  | PMPAQGVVNK       |
| <i>mxcE</i> | <i>Myxococcus fulvus</i> HW-1              | SGSLFPLSSPGGAVQVGGAQQVFGMAEGLVNYTR  | PLPAQGVVNK       |
| <i>mxcE</i> | <i>Myxococcus stipitatus</i> DSM 14675     | SASLFPMSSPGGALQVGGAQQVFGMAEGLVNYTR  | PMPAQGVVNK       |
| <i>mxcE</i> | <i>Myxococcus xanthus</i> DK 1622          | SGSLFPLSSPGGAVQVGGAQQVFGMAEGLVNYTR  | PLPAQGVVNK       |
| <i>mxcE</i> | <i>Polyangium fumosum</i> DSM 14668        | SASLFTLSSPGGSVQVGGSQQVFGMAEGLVNYTR  | TLPSQGVVNK       |
| <i>mxcE</i> | <i>Polyangium solediatum</i> DSM 14670     | SASLFTLSSPGGSVQVGGSQQVFGMAEGLVNYTR  | TLPSQGVVNK       |
| <i>mxcE</i> | <i>Polyangium</i> sp. SDU3-1               | SASLFTLSSPGGAVQVGGAQQVFGMAEGLVNYTR  | TLPAQGVVNK       |
| <i>mxcE</i> | <i>Sandaracinus amylolyticus</i> DSM 53668 | SASLFPLSSPGGALQVGGAQQVFGMAEGLVCYTR  | PLPAQGVVCK       |
| <i>mxcE</i> | <i>Stigmatella aurantiaca</i> DW4/3-1      | SGSLFPLSSPGGALQVGGAQQVYFGMAEGLVNYTR | PLPAQGVVNK       |
| <i>mxcE</i> | <i>Stigmatella aurantiaca</i> S15          | SGSLFPLSSPGGALQVGGAQQVYFGMAEGLVNYTR | PLPAQGVVNK       |
| <i>mxcE</i> | <i>Vitiosangium</i> sp. GDMCC 1.1324       | SASLFPMSSPGGALQVGGAQQVFGMAEGLVNYTR  | PMPAQGVVNK       |

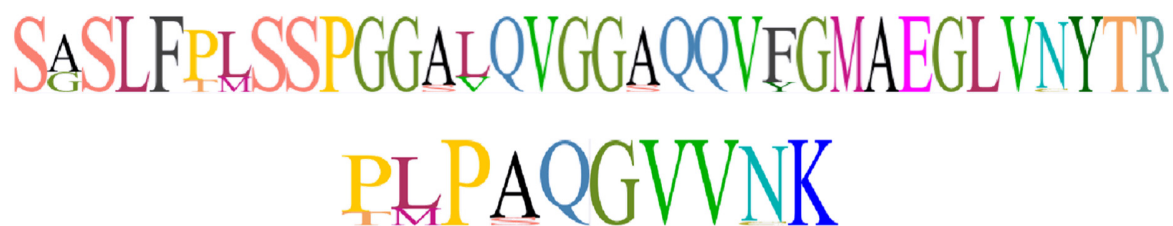

Figure S73. Consensus sequences for 8 angstrom signature code (upper) and Stachelhaus code (lower) of myxobacterial mxCE translations.

### 3 Assessment of biological activities

Table S3. Minimum inhibitory concentrations (MICs) for the synthetic myxochelins against a panel of microorganisms and MICs of reference drugs in combination with **9a** (128 µg/mL). -: not determined.

| compound                  | MIC [µg/mL]                     |                           |                             |                                |                                |
|---------------------------|---------------------------------|---------------------------|-----------------------------|--------------------------------|--------------------------------|
|                           | <i>S. aureus</i><br>str. Newman | <i>E. coli</i><br>BW25113 | <i>E. coli</i><br>K12 ΔtolC | <i>C. albicans</i><br>DSM 1665 | <i>M. hiemalis</i><br>DSM 2656 |
| <b>9a</b>                 | > 128                           | > 128                     | > 128                       | > 128                          | > 128                          |
| <b>9b</b>                 | > 128                           | > 128                     | > 128                       | > 128                          | > 128                          |
| <b>9c</b>                 | > 128                           | > 128                     | > 128                       | > 128                          | > 128                          |
| <b>9d</b>                 | > 128                           | > 128                     | > 128                       | > 128                          | > 128                          |
| <b>9e</b>                 | > 128                           | > 128                     | > 128                       | > 128                          | > 128                          |
| <b>9f</b>                 | > 128                           | > 128                     | > 128                       | > 128                          | > 128                          |
| <b>9g</b>                 | > 128                           | > 128                     | > 128                       | > 128                          | > 128                          |
| <b>9h</b>                 | > 128                           | > 128                     | > 128                       | > 128                          | > 128                          |
| <b>9i</b>                 | > 128                           | > 128                     | > 128                       | > 128                          | > 128                          |
| Ciprofloxacin             | 0.125                           | -                         | -                           | -                              | -                              |
| Linezolid                 | 2                               | -                         | -                           | -                              | -                              |
| Gentamicin                | 0.5                             | -                         | -                           | -                              | -                              |
| Daptomycin                | 1                               | -                         | -                           | -                              | -                              |
| Ciprofloxacin + <b>9a</b> | 0.125                           | -                         | -                           | -                              | -                              |
| Linezolid + <b>9a</b>     | 2                               | -                         | -                           | -                              | -                              |
| Gentamicin + <b>9a</b>    | 0.5                             | -                         | -                           | -                              | -                              |
| Daptomycin + <b>9a</b>    | 1                               | -                         | -                           | -                              | -                              |

## 4 References

1. O'Leary, N.A.; Wright, M.W.; Brister, J.R.; Ciufo, S.; Haddad, D.; McVeigh, R.; Rajput, B.; Robbertse, B.; Smith-White, B.; Ako-Adjei, D.; et al. Reference sequence (RefSeq) database at NCBI: current status, taxonomic expansion, and functional annotation. *Nucleic Acids Res.* **2016**, *44*, D733-45, doi:10.1093/nar/gkv1189.
2. Röttig, M.; Medema, M.H.; Blin, K.; Weber, T.; Rausch, C.; Kohlbacher, O. NRPSpredictor2—a web server for predicting NRPS adenylation domain specificity. *Nucleic Acids Res.* **2011**, *39*, W362-W367, doi:10.1093/nar/gkr323.
